# Supplementary material for: Cholera- and Anthrax-Like Toxins Are among Several New ADP-Ribosyltransferases
Source: PubMed Central journal article supplement (PMC3000352; doi:10.1371/journal.pcbi.1001029), 2010-12-09
Supplement: pcbi.1001029.s001.pdf [file pcbi.1001029.s001.pdf]

Text S1

# Supplementary Discussion

## Fold recognition, structure prediction and modeling

Locating the ADPRT pattern in a protein sequence reveals the catalytic domain. Pattern matches, adjusted to be consistent with sequence alignment, reveals specific catalytic residues.

Fold recognition is a key step toward understanding ADPRT structure and selecting modeling templates. The number of correctly predicted residues ( $C_{\alpha} \leq 3.5 \text{ \AA}$ ) correlates with  $J_{3D\text{-jury}}$ , according to the formula:  $N = 0.86J_{3D\text{-jury}} + 9.91$  [S1]. A typical ADPRT domain, at 200 residues, would therefore receive a “perfect score” of about 220. In practice, we find predictions are strong for  $J_{3D\text{-jury}}$  above 100 and often acceptable for  $J_{3D\text{-jury}} \geq 40$ . Fold recognition results depend on lengths and the part of a sequence tested. It is important to fragment the test sequences in various ways and run many jobs (Dataset S1). Also, we expect fold recognition to become more reliable over time as new non-ADPRT structures lessen wrong fold assignments.

We produced two model types: full-length and active site. We conservatively assume the new toxins, based on how we searched for them, follow existing sequence-structure-function trends especially for key residues. We show these trends – based on structure and biochemical investigations spanning more than a century [S2, S3] – in Figures 1 and 2. The full-length models (Figure 5) merge data from different templates. We do not intend to imply any specific domain orientation or any details on specific embellishments to the core fold. Active-site models (Figure 6) are our most accurate toxin models because structure conservation is highest in this region. They help in understanding likely  $\text{NAD}^+$  binding modes and aid in envisioning the reaction mechanism.

Model accuracy depends on suitable template selection and alignment quality. High accuracy models may contain main chain distortions or shifts, incorrectly packed side chains and incorrectly modeled loops. Medium accuracy models may contain more alignment errors and errors in loop regions. We intend low-accuracy models as a general structure framework only. They are not suited for detailed analysis because they may have more significant errors [S4]. Estimates of the global distance test total score (GDT-TS) – which counts  $C_{\alpha}$  pairs that have a distance  $< 1, 2, 4, 8 \text{ \AA}$  after overlap – can be used to assess model quality. Larger values are better. Values  $> 40$  imply the correct fold and values  $> 84$  imply reliable use in molecular replacement [S5]. Our best models resulted from high sequence identity and high structure resolution. We list specific quality scores in Tables S2 and S3.

## Toxin secretion, cell entry and domain organization

Domain boundary prediction is difficult [S2]. Domain prediction accuracy varies according to the method used. In DOMAC, domain number is 75% accurate for template-based cases and 46% accurate for *ab initio* cases. Domain boundaries, for template-based cases have a 50% specificity and 77% sensitivity. For *ab initio* cases, this drops to 27% and

14% respectively [S6]. We expect our sliding window fold recognition results to have much higher accuracy, perhaps even approaching new breakthrough methods [S7]. But clearly ADPRT toxin domain combinations are more wide-ranging than previously thought (Figure 4).

Domain organization may be driven by different secretion strategies. Clearly, the ADPRT toxins must leave the pathogen cell and enter the host cell to have an effect. Thus, we expect the pathogen cell to secrete the toxins. Often secretion involves a type II, III or VI secretion system, and toxin domain organization may reflect the secretion strategy. N-terminal disorder, for example, may suggest interaction with a secretion chaperone. In all cases, neural network evidence from SecretomeP suggests secretion, but the mechanism is not always clear. SignalP sometimes suggests a signal peptide (it has an accuracy of 0.95 for Gram negative organisms and 0.98 for Gram positive organisms). In other cases, we rely more on genetic context to learn about secretion.

Another explanation of the varying domain organization is different cell entry strategies. Small ADPRT toxins lacking receptor binding and membrane translocation machinery may be (i) associated with receptor-binding and membrane translocation domains that exist as separate polypeptides (ii) injected directly by a secretion system (iii) aided by other pore-forming toxins (iv) introduced through a transporter or (v) act at the cell-surface. Larger ADPRT toxins, however, may have directly attached receptor binding and membrane translocation domains that remain with the toxin domain or are cleaved off through proteolysis. They may also have an activation moiety needed for binding an activating protein. We speculate that alpha helical regions may have a greater tendency to be pore-formers, while beta sheet regions may suggest receptor binding. Predicting non-catalytic domains structures provides insight into the cell entry strategies of the toxins.

## Toxin activation, $\text{NAD}^+$ binding and the reaction mechanism

Often ADPRT toxins do not require activation, but sometimes they do. Common modes of ADPRT toxin activation include: (i) binding to factor activating ExoS (FAS) (for the ExoS-like subgroup), (ii) a combination of proteolysis, reduction and ADP-ribosylating factor (ARF) binding (for cholera toxin and heat labile toxin), (iii) a combination of ATP and reduction in pertussis toxin.

We conservatively assume that  $\text{NAD}^+$  binding in the new ADPRTs will follow trends in previous structures. Specific, conserved residues bind to A-phosphate, N-ribose and nicotinamide. There is little variation except for adenine ring orientation, and no conserved residues exist for adenine and A-ribose binding. Predictions for the adenine ring are difficult but less important to ADPRT toxin function. Variable  $\text{NAD}^+$  binding at the A-ribose may exist because H-bonding is to the protein backbone. Also, H-bonds to the A-ribose are within a loop region instead of a side-chain from a conserved

secondary structure element. H-bonding is sparse at the nicotinamide ring, suggesting aromatic or hydrophobic interactions position this ring.

The reaction mechanism follows three steps: nicotinamide proteolysis to form the oxacarbenium ion, rotation about the  $O_{SD}$ - $P_N$  bond to relieve strain in the bound  $NAD^+$  substrate which forms another ionic intermediate and, finally, nucleophilic attack of the second intermediate by the target. Based on the iota toxin alleviated-strain model, a Tyr in the second step induces a rotation of the oxacarbenium ion about the phosphate single bond ( $O_{SD}$ - $P_N$ ) and helps reduce the nucleophile-electrophile distance. Interestingly, this Tyr is lacking in EFV toxin; F350 replaces it. Previous work has shown activity is retained on mutating Tyr to Phe in Iota toxin [S8]. T71 replaces the Tyr in Chelt and S738 replaces the Tyr in TccC5, suggesting that substitution to polar residues may not reduce activity as much as expected.

### Challenges for *in vitro* characterization

The calculated solubility probability ranges from 0.06 to 0.611. This tendency toward insolubility matches our experiences at the lab bench. Disordered regions outside the catalytic domain may obstruct solubility and crystallization efforts.

The macromolecule target for ADPRT toxin ADP-ribosylation is relevant for understanding ADPRT toxicology and for lab investigations. Such knowledge is academically important, but we do not need it to develop vaccines or inhibitors. There are many ADP-ribosylation superfamily targets. They include DNA binding proteins, membrane proteins, extracellular body fluid proteins, RNA polymerase, dinitrogenase reductase, DNA and rifamycin. ADPRT targets are wide-ranging, including many G-proteins (eEF2, Ras, Rho and Gs- $\alpha$ , etc.), actin and RNA-binding proteins. Pinpointing the possible targets is challenging and in its infancy from a predictive standpoint.

Target prediction accuracy currently depends on sequence identity. We can sometimes assign target substrate based on several facts. First, target specificity seems partly or fully contained in the region B loop, PN loop and the ARTT loop (Table 4) [S9]. Second, the region 3 EXE toxins target specific Arg residues on targets; QXE toxins target Rho or specific target Asn, Gln or Cys residue [S9]. Third, the E.C. number of an enzyme rarely changes above 40% sequence identity [S10].

One trend is that many ADPRT targets are in the G-protein clan (Pfam CL0017) [S11, S12]. Specific families targeted in the past include the elongation factor Tu GTP binding domain family (Pfam GTP\_EFTU, PF00009): DT-like toxins target eEF2 and MTX targets EF-TU; the Ras family (Pfam PF00071): ExoS-like toxins target Ras and C3-like toxins target Rho; and the Ga family (Pfam PF00503): CT-like toxins target Gas and PT-like toxins target Gai. The G-protein clan has many other families that may be targets according to this trend. These include HSR1-related GTP-binding proteins (Pfam MMR\_HSR1, PF01926); the dynamin family involved

in endocytosis (Pfam Dynamin\_N, PF00350); the septin family involved in cytokinesis (Pfam PF00735); the Piro family involved in mitochondrial motility (Pfam PF08477); the ATP binding proteins (Pfam ATP\_bind\_1, PF03029); the bacterial resistance proteins (Pfam AIG1, PF04548), the nucleolar GTP-binding proteins (Pfam NOG1, PF06858); interferon-inducible GTPases (Pfam IIGP, PF05049); the signal recognition particle receptor beta subunit (Pfam SRPRB, PF09439); and the DUF258 family (Pfam PF03193). Interestingly, the family of ADP-ribosylation factors (Pfam Arf family; PF00025) is also in the G-protein clan.

Another common target is the actin family (Pfam PF00022 in Pfam clan CL0108, Actin\_ATPase) [S11, S12]. Some actin-targeting toxins ADP-ribosylate all actin isoforms, including  $\alpha$ -actin while others ADP-ribosylate  $\beta/\gamma$ -non-muscle G-actin and  $\gamma$ -smooth muscle actin (e.g. C2 toxin) [S13]. GRP7, targeted by HopU1, is part of the RNA-recognition motif family (Pfam RRM\_1, PF00076) within the RRM clan (Pfam CL0221) [S12, S14]. Other ADPRTs have different targets: PARPs target DNA binding proteins; ARTs target membrane proteins and proteins of extracellular body fluid; Alt, ModA and ModB target RNA polymerase; DRATs target dinitrogenase reductase; pierisin targets DNA and Arr targets rifamycin [S15].

### References

- S1. Kajan L, Rychlewski L. (2007) Evaluation of 3D-jury on CASP7 models. BMC Bioinformatics 8: 304.
- S2. Tress M, Cheng J, Baldi P, Joo K, Lee J, et al. (2007) Assessment of predictions submitted for the CASP7 domain prediction category. Proteins 69 Suppl 8: 137-151.
- S3. Holbourn KP, Shone CC, Acharya KR. (2006) A family of killer toxins. exploring the mechanism of ADP-ribosylating toxins. FEBS J 273: 4579-4593.
- S4. Cozzetto D, Giorgetti A, Raimondo D, Tramontano A. (2008) The evaluation of protein structure prediction results. Mol Biotechnol 39: 1-8.
- S5. Giorgetti A, Raimondo D, Miele AE, Tramontano A. (2005) Evaluating the usefulness of protein structure models for molecular replacement. Bioinformatics 21 Suppl 2: ii72-6.
- S6. Cheng J. (2007) DOMAC: An accurate, hybrid protein domain prediction server. Nucleic Acids Res 35: W354-6.
- S7. Yeats C, Redfern OC, Orengo C. (2010) A fast and automated solution for accurately resolving protein domain architectures. Bioinformatics 26: 745-751.
- S8. Tsuge H, Nagahama M, Oda M, Iwamoto S, Utsunomiya H, et al. (2008) Structural basis of actin recognition and arginine ADP-ribosylation by clostridium perfringens iota-toxin. Proc Natl Acad Sci U S A 105: 7399-7404.
- S9. Sun J, Maresco AW, Kim JJ, Barbieri JT. (2004) How bacterial ADP-ribosylating toxins recognize substrates. Nat Struct Mol Biol 11: 868-876.

- S10. Tian W, Skolnick J. (2003) How well is enzyme function conserved as a function of pairwise sequence identity? *J Mol Biol* 333: 863-882.
- S11. Deng Q, Barbieri JT. (2008) Molecular mechanisms of the cytotoxicity of ADP-ribosylating toxins. *Annu Rev Microbiol* 62: 271-288.
- S12. Finn RD, Tate J, Mistry J, Coggill PC, Sammut SJ, et al. (2008) The pfam protein families database. *Nucleic Acids Res* 36: D281-8.
- S13. Barth H, Blocker D, Aktories K. (2002) The uptake machinery of clostridial actin ADP-ribosylating toxins--a cell delivery system for fusion proteins and polypeptide drugs. *Naunyn Schmiedebergs Arch Pharmacol* 366: 501-512.
- S14. Fu ZQ, Guo M, Jeong BR, Tian F, Elthon TE, et al. (2007) A type III effector ADP-ribosylates RNA-binding proteins and quells plant immunity. *Nature* 447(7142): 284-288.
- S15. Fieldhouse RJ, Merrill AR. (2008) Needle in the haystack: Structure-based toxin discovery. *Trends Biochem Sci* 33: 546-556.
- S16. Armougom F, Moretti S, Poirot O, Audic S, Dumas P, et al. (2006) Espresso: Automatic incorporation of structural information in multiple sequence alignments using 3D-coffee. *Nucleic Acids Res* 34: W604-8.
- S17. Gouet P, Robert X, Courcelle E. (2003) ESPript/ENDscript: Extracting and rendering sequence and 3D information from atomic structures of proteins. *Nucleic Acids Res* 31: 3320-3323.
- S18. Shatsky M, Nussinov R, Wolfson HJ. (2004) A method for simultaneous alignment of multiple protein structures. *Proteins* 56: 143-156.

# Supplementary Figures

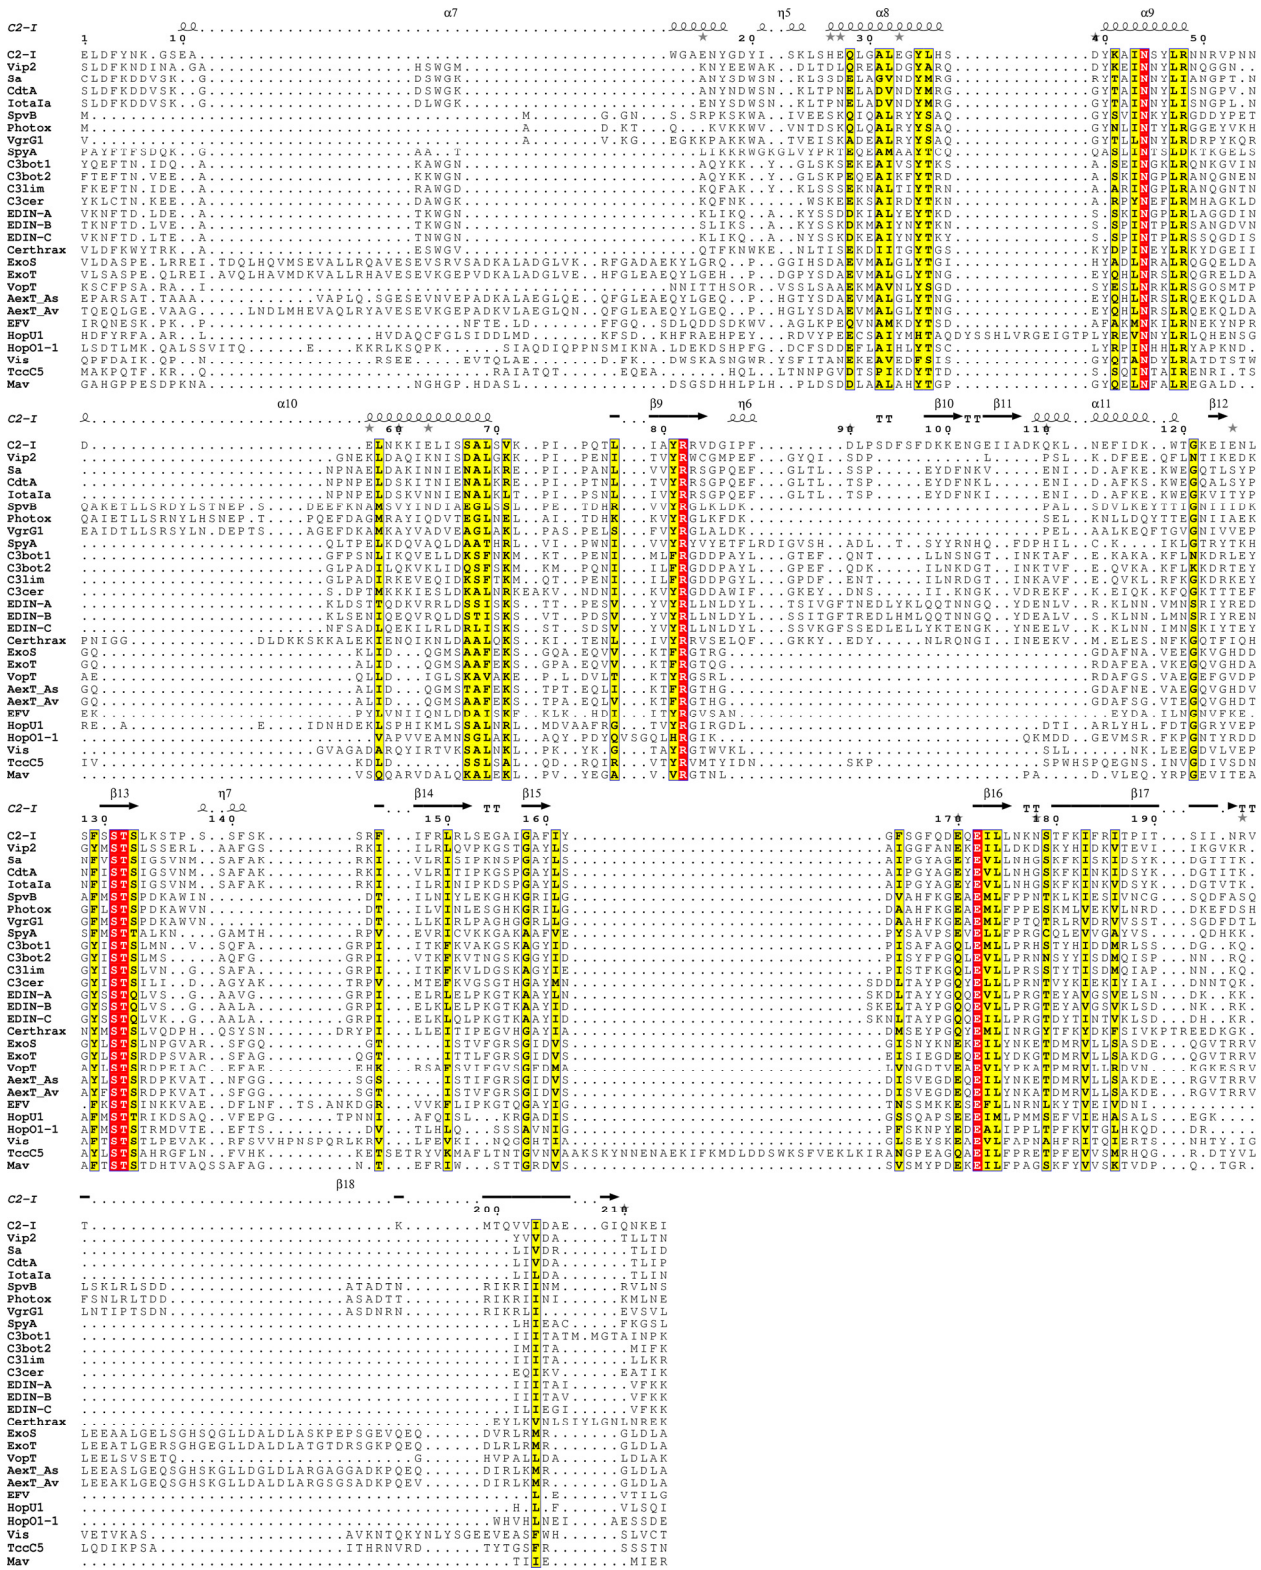

**Figure S1. Multiple sequence alignment of ExoS-like, C2-like and C3-like toxin subgroups.**

Multiple sequence alignments reveal conserved residues among the known and new ADPRT toxins within the ExoS-like, C2-like and C3-like toxin subgroups. In the alignment, red columns indicate identity and yellow columns indicate conserved positions. We built this alignment using 3D-Coffee [S16] and guided it with PDB files: SpvB (2GWMA), Iota (1GIQA), C3bot2 (1R45A), C3lim (3BW8A), C3bot1 (2BOVB), C2-I (2J3VA), C3stau2 (1OJQA), Vip2 (1QS1A) and SpvB (2GWL A). We visualized the alignment with ESPrnt [S17].

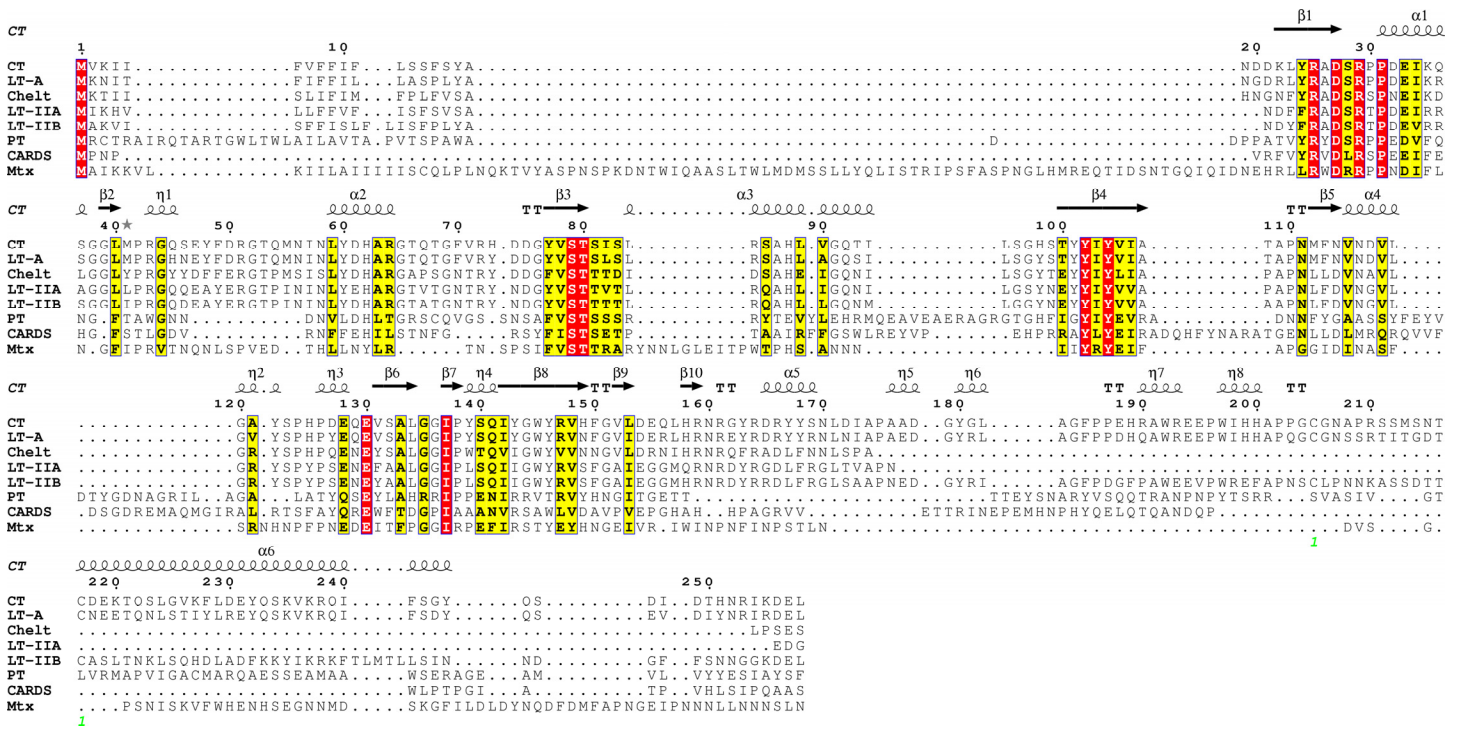

**Figure S2. Multiple sequence alignment of the CT-PT-like toxin subgroup.**

Multiple sequence alignments reveal conserved residues among the known and new ADPRT toxins within the CT-PT-like subgroup. In the alignment, red columns indicate identity and yellow columns indicate conserved positions. We built the alignment with 3D-Coffee [S16] and guided it with PDB files: CT (1S5EA), LT-IIB (1TIIA), Mtx (2VSAA), LT-A (1LT3A) and PT (1PTOA). The alignment was visualized by ESPrpt [S17].



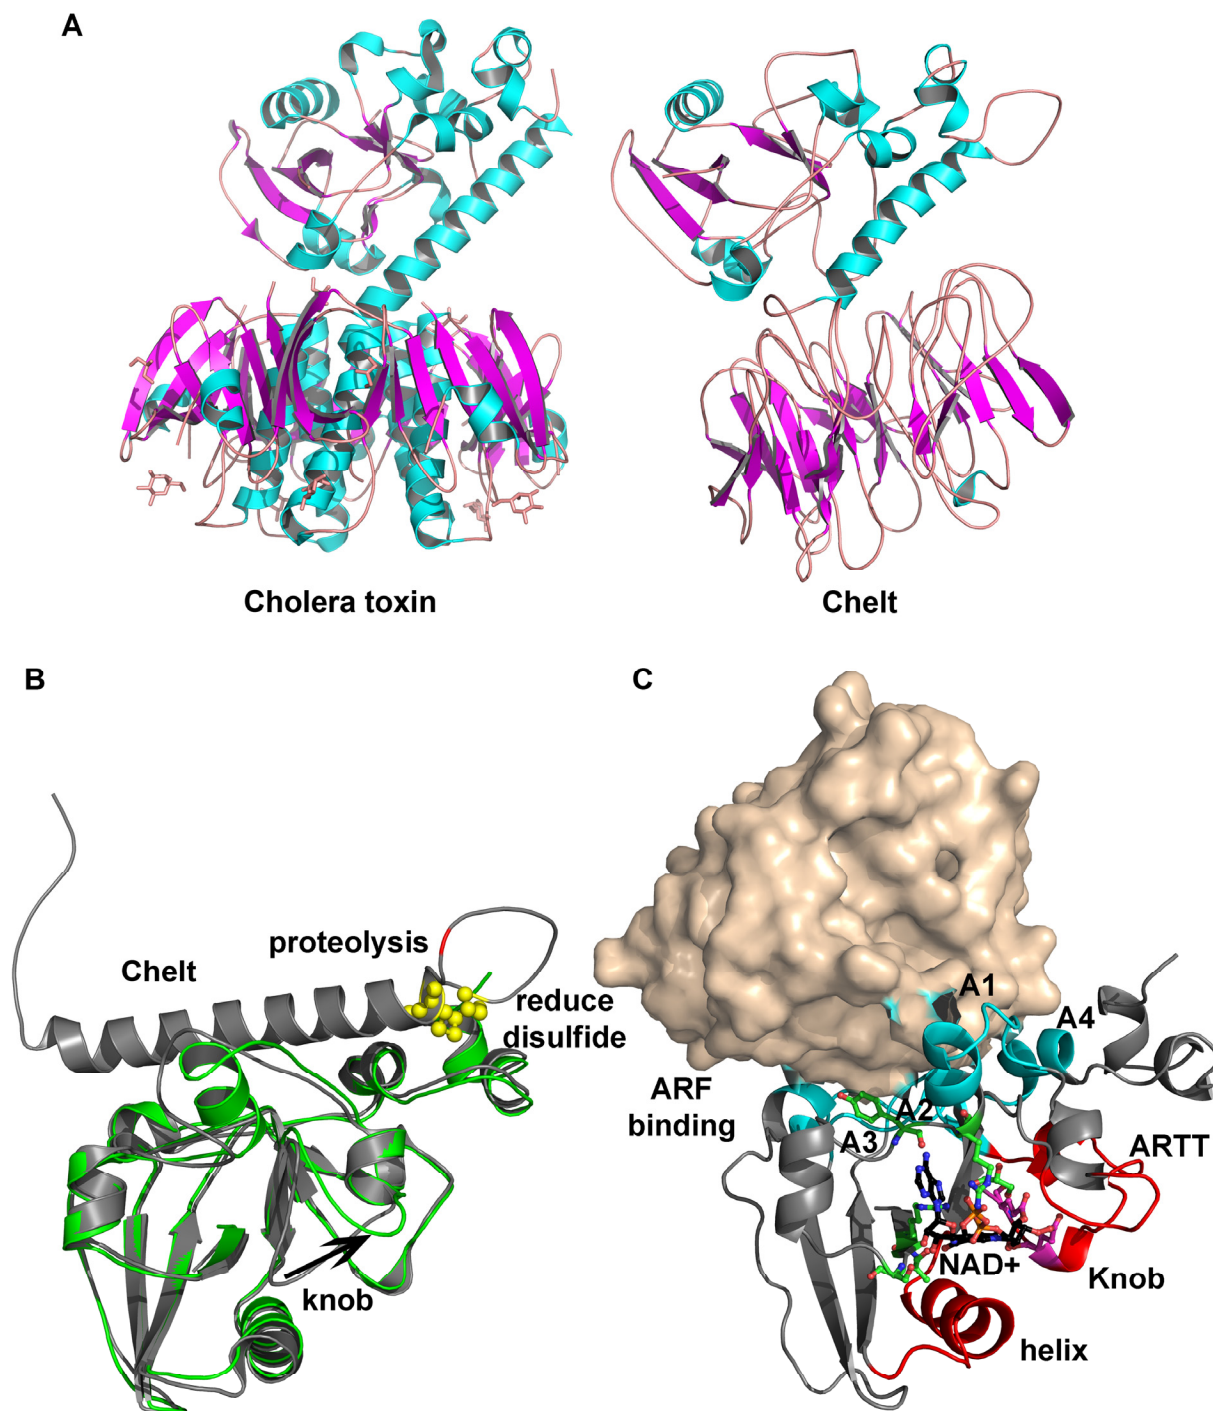

**Figure S3. Chelt compared to cholera toxin and proposed Chelt-Arf complex.**

(A) Cholera toxin (PDB 1S5D) (left) compared to Chelt (right). (B) Likeness to heat labile toxins suggest Chelt activation by reduction of the disulfide bond between C205 and C220, proteolysis at or near I215 (details unclear, due to a four amino acid deletion compared to LT-A between H214 and I215). (C) Comparison of the apo and NAD<sup>+</sup> bound models shows the knob region swinging on Arf binding, allowing NAD<sup>+</sup> to enter the active site. We show polar residues in green, positively charged residues in blue, negatively charged residues and target interaction loops in red, non-polar residues and the toxin scaffold in grey. Interaction with an ADP-ribosylating factor, perhaps ARF3, may be mediated by regions A1 (45-57), A2 (109-113), A3 (134-141) and A4 (167-182).

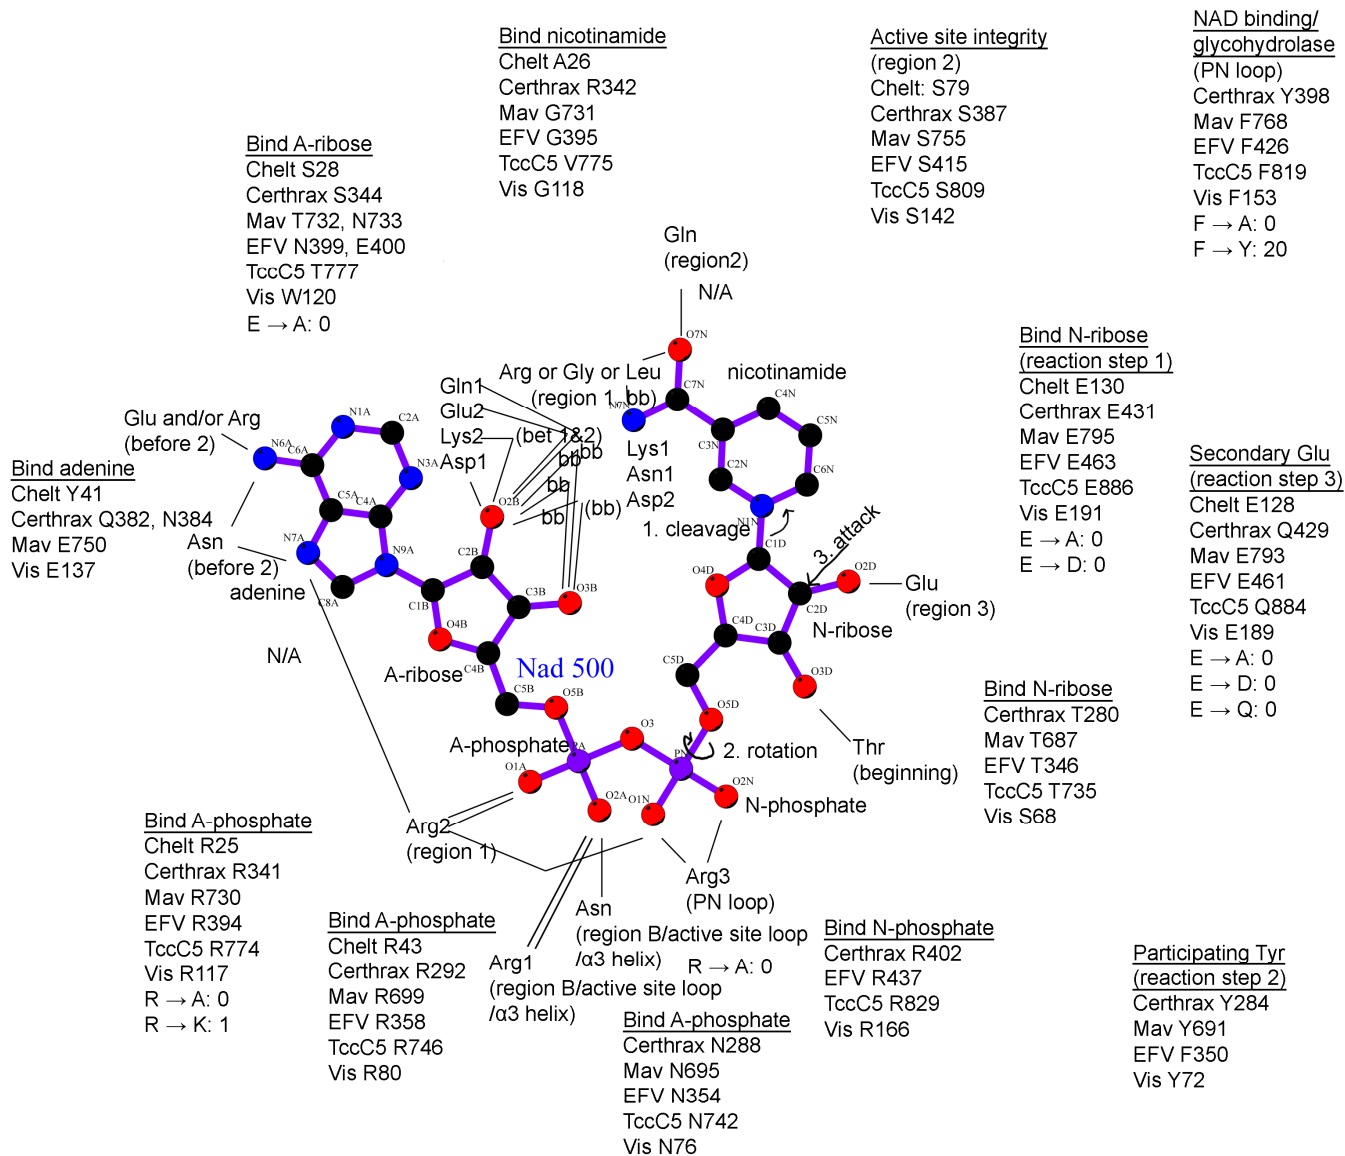

**Figure S4. NAD<sup>+</sup> binding in the new toxins.**

We substantiated toxin predictions using a digital NAD<sup>+</sup> binding test that reveals plausible NAD<sup>+</sup> binding mode for each new toxin. NAD<sup>+</sup> binding occurs through hydrogen bonds and hydrophobic interactions. H-bonds help position adenine (A), adenine-ribose (A-ribose), adenine- and nicotinamide-phosphate (A- and N-phosphate), nicotinamide-ribose (N-ribose) and nicotinamide. Most variation in NAD<sup>+</sup> binding occurs at the A-ribose, due to protein backbone H-bonding within a loop region instead of side chain H-bonding within a conserved secondary structure element. H-bonding is sparse at the nicotinamide ring. Interactions not involving NAD<sup>+</sup> are responsible for holding the catalytic Glu in place, orienting the secondary catalytic Glu or Gln and stiffening the active site. Hydrophobic interactions also help to hold the active site in place. Activity data from [S8] are shown.

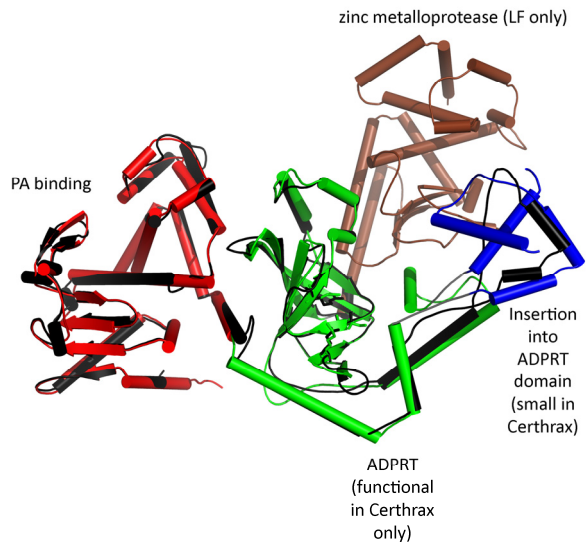

**Figure S5. *B. cereus* Certhrax compared to *B. anthracis* lethal factor.**

Certhrax model (black) compared to anthrax lethal factor (PDB 1J7N), superimposed by finding a common geometric core using MultiProt [S18]. Anthrax lethal factor PA binding domain (red), vestigial ADPRT domain (green), ADPRT domain insertion (blue) and catalytic metalloprotease domain (brown).

# Supplementary Tables

**Table S1. Percent Identity Matrix for the Catalytic Core of the Known and Putative Mono-ADP-Ribosylating Toxins**

|             | AexT_A0FKE4 | ExoS | AexT_Q93Q17 | ExoT | VopT | Vip2Ac | Iotala | CdtA | Sa- | C2-I | SpvB | C3bot1 | C3lim | C3bot2 | EDIN-A | EDIN-B | EDIN-C | SpvA | HopU1 | CT  | LT-IIIB | LT-IIA | LT-A | NarE | PT  | CARDS | Mtx | VgrG1 | EFV | Mav | Vis | TccC5 | Chelt | Certhrax |
|-------------|-------------|------|-------------|------|------|--------|--------|------|-----|------|------|--------|-------|--------|--------|--------|--------|------|-------|-----|---------|--------|------|------|-----|-------|-----|-------|-----|-----|-----|-------|-------|----------|
| AexT_A0FKE4 | 100         | 73   | 88          | 77   | 45   | 21     | 20     | 19   | 18  | 23   | 21   | 20     | 20    | 21     | 16     | 14     | 14     | 12   | 20    | 21  | 18      | 16     | 17   | 17   | 13  | 14    | 13  | 24    | 23  | 30  | 23  | 20    | 16    | 16       |
| ExoS        | 73          | 100  | 71          | 76   | 40   | 25     | 22     | 19   | 18  | 23   | 21   | 22     | 26    | 24     | 18     | 16     | 18     | 12   | 20    | 22  | 21      | 21     | 20   | 11   | 13  | 17    | 24  | 26    | 30  | 26  | 23  | 23    | 17    | 16       |
| AexT_Q93Q17 | 88          | 71   | 100         | 74   | 46   | 22     | 21     | 20   | 19  | 22   | 22   | 22     | 22    | 22     | 15     | 13     | 14     | 14   | 21    | 23  | 17      | 16     | 19   | 17   | 11  | 15    | 16  | 25    | 25  | 30  | 23  | 23    | 17    | 16       |
| ExoT        | 77          | 76   | 74          | 100  | 43   | 24     | 21     | 21   | 20  | 23   | 22   | 25     | 25    | 24     | 16     | 19     | 19     | 14   | 19    | 23  | 18      | 18     | 19   | 21   | 10  | 17    | 14  | 23    | 21  | 33  | 20  | 20    | 17    | 16       |
| VopT        | 45          | 40   | 46          | 43   | 100  | 22     | 22     | 24   | 23  | 16   | 23   | 16     | 18    | 18     | 15     | 16     | 13     | 14   | 22    | 18  | 15      | 13     | 17   | 22   | 13  | 14    | 16  | 27    | 22  | 27  | 26  | 22    | 17    | 18       |
| Vip2Ac      | 21          | 25   | 22          | 24   | 22   | 100    | 42     | 42   | 41  | 30   | 28   | 35     | 30    | 31     | 33     | 29     | 29     | 25   | 21    | 19  | 14      | 13     | 19   | 19   | 21  | 13    | 19  | 29    | 25  | 24  | 18  | 19    | 13    | 29       |
| Iotala      | 20          | 22   | 21          | 21   | 22   | 42     | 100    | 88   | 86  | 34   | 25   | 28     | 26    | 25     | 26     | 23     | 25     | 23   | 25    | 18  | 15      | 15     | 16   | 22   | 18  | 17    | 15  | 27    | 27  | 28  | 22  | 15    | 14    | 32       |
| CdtA        | 19          | 19   | 20          | 21   | 24   | 42     | 88     | 100  | 91  | 33   | 25   | 27     | 24    | 25     | 26     | 23     | 23     | 25   | 25    | 16  | 14      | 14     | 14   | 20   | 18  | 17    | 17  | 26    | 27  | 27  | 25  | 16    | 13    | 34       |
| Sa-         | 18          | 18   | 19          | 20   | 23   | 41     | 86     | 91   | 100 | 32   | 25   | 25     | 23    | 24     | 26     | 23     | 23     | 24   | 26    | 17  | 16      | 16     | 15   | 19   | 17  | 16    | 17  | 26    | 24  | 26  | 24  | 17    | 14    | 32       |
| C2-I        | 23          | 23   | 22          | 23   | 16   | 30     | 34     | 33   | 32  | 100  | 24   | 21     | 21    | 22     | 19     | 18     | 20     | 19   | 24    | 15  | 13      | 12     | 15   | 17   | 16  | 12    | 14  | 21    | 24  | 24  | 28  | 16    | 10    | 26       |
| SpvB        | 21          | 21   | 22          | 22   | 23   | 28     | 25     | 25   | 25  | 24   | 100  | 17     | 18    | 16     | 26     | 25     | 25     | 24   | 24    | 15  | 14      | 13     | 15   | 16   | 16  | 14    | 17  | 56    | 25  | 28  | 24  | 25    | 15    | 25       |
| C3bot1      | 20          | 22   | 22          | 25   | 16   | 35     | 28     | 27   | 25  | 21   | 17   | 100    | 69    | 71     | 33     | 35     | 38     | 25   | 20    | 17  | 16      | 17     | 18   | 15   | 15  | 14    | 11  | 22    | 24  | 18  | 19  | 15    | 13    | 28       |
| C3lim       | 20          | 26   | 22          | 25   | 18   | 30     | 26     | 24   | 23  | 21   | 18   | 69     | 100   | 73     | 31     | 35     | 36     | 21   | 18    | 18  | 15      | 16     | 19   | 18   | 16  | 13    | 13  | 21    | 29  | 22  | 19  | 16    | 15    | 30       |
| C3bot2      | 21          | 24   | 22          | 24   | 18   | 31     | 25     | 25   | 24  | 22   | 16   | 71     | 73    | 100    | 30     | 33     | 34     | 22   | 18    | 16  | 14      | 15     | 17   | 16   | 14  | 14    | 19  | 28    | 25  | 22  | 15  | 12    | 28    |          |
| EDIN-A      | 16          | 18   | 15          | 16   | 15   | 33     | 26     | 26   | 26  | 19   | 26   | 33     | 31    | 30     | 100    | 83     | 69     | 29   | 16    | 15  | 12      | 12     | 16   | 9    | 15  | 17    | 11  | 31    | 21  | 21  | 16  | 18    | 12    | 28       |
| EDIN-B      | 14          | 16   | 13          | 19   | 16   | 29     | 23     | 23   | 23  | 18   | 25   | 35     | 35    | 33     | 83     | 100    | 76     | 29   | 18    | 13  | 11      | 10     | 13   | 12   | 15  | 16    | 13  | 29    | 24  | 21  | 17  | 18    | 12    | 28       |
| EDIN-C      | 14          | 18   | 14          | 19   | 13   | 29     | 25     | 23   | 23  | 20   | 25   | 38     | 36    | 34     | 69     | 76     | 100    | 29   | 21    | 13  | 12      | 13     | 13   | 12   | 15  | 14    | 14  | 29    | 24  | 20  | 16  | 16    | 10    | 29       |
| SpvA        | 12          | 12   | 14          | 14   | 14   | 25     | 23     | 25   | 24  | 19   | 24   | 25     | 21    | 22     | 29     | 29     | 29     | 100  | 24    | 15  | 19      | 19     | 15   | 13   | 19  | 23    | 23  | 29    | 18  | 20  | 21  | 21    | 23    |          |
| HopU1       | 20          | 20   | 21          | 19   | 22   | 21     | 25     | 25   | 26  | 24   | 24   | 20     | 18    | 18     | 16     | 18     | 21     | 24   | 100   | 16  | 17      | 18     | 16   | 21   | 14  | 13    | 23  | 25    | 24  | 30  | 28  | 11    | 19    | 20       |
| CT          | 21          | 22   | 23          | 23   | 18   | 19     | 18     | 16   | 17  | 15   | 15   | 17     | 18    | 16     | 15     | 13     | 13     | 15   | 16    | 100 | 64      | 64     | 89   | 24   | 28  | 20    | 26  | 12    | 19  | 17  | 15  | 15    | 59    | 14       |
| LT-IIIB     | 18          | 21   | 17          | 18   | 15   | 14     | 15     | 14   | 16  | 13   | 14   | 16     | 15    | 14     | 12     | 11     | 12     | 19   | 17    | 64  | 100     | 88     | 65   | 25   | 28  | 19    | 25  | 12    | 14  | 18  | 16  | 10    | 63    | 14       |
| LT-IIA      | 16          | 21   | 16          | 18   | 13   | 13     | 15     | 14   | 16  | 12   | 13   | 17     | 16    | 15     | 12     | 10     | 13     | 19   | 18    | 64  | 88      | 100    | 64   | 24   | 25  | 20    | 26  | 12    | 14  | 17  | 15  | 10    | 63    | 15       |
| LT-A        | 17          | 21   | 19          | 19   | 17   | 19     | 16     | 14   | 15  | 15   | 15   | 18     | 19    | 17     | 16     | 13     | 13     | 15   | 16    | 89  | 65      | 64     | 100  | 27   | 27  | 21    | 27  | 12    | 15  | 16  | 15  | 13    | 61    | 15       |
| NarE        | 17          | 20   | 17          | 21   | 22   | 19     | 22     | 20   | 19  | 17   | 16   | 15     | 18    | 16     | 9      | 12     | 12     | 13   | 21    | 24  | 25      | 24     | 27   | 100  | 18  | 18    | 19  | 14    | 16  | 21  | 26  | 12    | 23    | 14       |
| PT          | 13          | 11   | 11          | 10   | 13   | 21     | 18     | 18   | 17  | 16   | 16   | 15     | 16    | 14     | 15     | 15     | 15     | 15   | 14    | 28  | 28      | 25     | 27   | 18   | 100 | 30    | 28  | 18    | 19  | 16  | 17  | 24    | 22    | 17       |
| CARDS       | 14          | 13   | 15          | 17   | 14   | 13     | 17     | 17   | 16  | 12   | 14   | 14     | 13    | 14     | 17     | 16     | 14     | 13   | 13    | 20  | 19      | 20     | 21   | 18   | 30  | 100   | 21  | 17    | 12  | 16  | 15  | 15    | 21    | 17       |
| Mtx         | 13          | 17   | 16          | 14   | 16   | 19     | 15     | 17   | 17  | 14   | 17   | 11     | 13    | 14     | 11     | 13     | 14     | 19   | 23    | 26  | 25      | 26     | 27   | 19   | 28  | 21    | 100 | 17    | 13  | 21  | 18  | 16    | 29    | 13       |
| VgrG1       | 24          | 24   | 25          | 23   | 27   | 29     | 27     | 26   | 26  | 21   | 56   | 22     | 21    | 19     | 31     | 29     | 29     | 23   | 25    | 12  | 12      | 12     | 12   | 14   | 18  | 17    | 17  | 100   | 25  | 24  | 26  | 22    | 16    | 27       |
| EFV         | 23          | 26   | 25          | 21   | 22   | 25     | 27     | 27   | 24  | 24   | 25   | 24     | 29    | 28     | 21     | 24     | 24     | 23   | 24    | 19  | 14      | 14     | 15   | 16   | 19  | 12    | 13  | 25    | 100 | 27  | 29  | 16    | 19    | 27       |
| Mav         | 30          | 30   | 30          | 33   | 27   | 24     | 28     | 27   | 26  | 24   | 28   | 18     | 22    | 25     | 21     | 21     | 20     | 29   | 30    | 17  | 18      | 17     | 16   | 21   | 16  | 16    | 21  | 24    | 27  | 100 | 33  | 20    | 22    | 22       |
| Vis         | 23          | 26   | 23          | 20   | 26   | 18     | 22     | 25   | 24  | 28   | 24   | 19     | 19    | 22     | 16     | 17     | 16     | 18   | 28    | 15  | 16      | 15     | 15   | 26   | 17  | 15    | 18  | 26    | 29  | 33  | 100 | 17    | 15    | 22       |
| TccC5       | 20          | 23   | 23          | 20   | 22   | 19     | 15     | 16   | 17  | 16   | 25   | 15     | 16    | 15     | 18     | 18     | 16     | 20   | 11    | 15  | 10      | 10     | 13   | 12   | 24  | 15    | 16  | 22    | 16  | 20  | 17  | 100   | 12    | 16       |
| Chelt       | 16          | 17   | 17          | 17   | 17   | 13     | 14     | 13   | 14  | 10   | 15   | 13     | 15    | 12     | 12     | 12     | 10     | 21   | 19    | 59  | 63      | 63     | 61   | 23   | 22  | 21    | 29  | 16    | 19  | 22  | 15  | 12    | 100   | 15       |
| Certhrax    | 16          | 16   | 16          | 16   | 18   | 19     | 32     | 34   | 32  | 26   | 25   | 28     | 30    | 28     | 28     | 28     | 29     | 23   | 20    | 14  | 14      | 15     | 15   | 14   | 17  | 17    | 13  | 27    | 27  | 22  | 16  | 15    | 100   |          |

**Legend**

|               |    |    |     |
|---------------|----|----|-----|
| Midnight zone | 0  | to | 24  |
| Twilight zone | 25 | to | 34  |
| Safe zone     | 35 | to | 100 |

**Notes**  
 mART core is approximately 100 residues long  
 Alignment constructed with SPEM using sequence profiles and predicted secondary structure  
 Matrix constructed with ClustalX 1.83

**Table S2. New ADPRT toxin model quality**

| Name                                            | Template                                   | Predicted GDT-TS <sup>a</sup> | Estimated RMSD <sup>b</sup> | TM-score <sup>c</sup> | Model quality <sup>d</sup> |
|-------------------------------------------------|--------------------------------------------|-------------------------------|-----------------------------|-----------------------|----------------------------|
| <b>Full-length</b>                              |                                            |                               |                             |                       |                            |
| Chelt                                           | 1lt4, 2vdr <sup>e</sup>                    | 45.67                         | -                           | -                     | High                       |
| Certhrax                                        | 1j7n, 1xfu, 1qs1                           | 36.40                         | 6.8                         | 0.74                  | High                       |
| Mav toxin                                       | 1wa8, 1ciy, ADPRT                          | 28.27                         | -                           | -                     | Fair                       |
| EFV toxin                                       | 1u4q, ADPRT                                | 4.52                          | -                           | -                     | Poor                       |
| TccC5                                           | 1k32, 2fkj, 2ecf, 2pn5, 2fqz, 1n1m         | 29.18                         | 12.1                        | 0.55                  | Fair                       |
| Vis toxin                                       | single domain – see catalytic domain below |                               |                             |                       |                            |
| <b>Catalytic domain (NAD<sup>+</sup>-bound)</b> |                                            |                               |                             |                       |                            |
| Chelt                                           | 2a5f                                       | 45.14                         | 4.83                        | 0.29                  | Excellent                  |
| Certhrax                                        | 1ojz                                       | 50.85                         | 1.07                        | 0.92                  | Good                       |
|                                                 | 2a9k                                       | 49.36                         | 6.38                        | 0.26                  |                            |
|                                                 | 1qs2                                       | 48.53                         | 0.57                        | 0.48                  |                            |
|                                                 | 1giq                                       | 48.18                         | 0.43                        | 0.49                  |                            |
|                                                 | 2wn7                                       | 48.18                         | 0.54                        | 0.52                  |                            |
|                                                 | 1og3                                       | 45.24                         | 1.81                        | 0.75                  |                            |
|                                                 | 2gwl                                       | 44.93                         | 2.15                        | 0.83                  |                            |
|                                                 | 1ojz                                       | 44.46                         | 1.22                        | 0.74                  | Good                       |
| Mav toxin                                       | 2a9k                                       | 44.39                         | 5.75                        | 0.26                  |                            |
|                                                 | 1qs2                                       | 42.88                         | 1.56                        | 0.42                  |                            |
|                                                 | 1giq                                       | 44.7                          | 1.51                        | 0.35                  |                            |
|                                                 | 2wn7                                       | 46.51                         | 1.43                        | 0.43                  |                            |
|                                                 | 1og3                                       | 43.99                         | 1.97                        | 0.73                  |                            |
|                                                 | 2gwl                                       | 46.14                         | 1.32                        | 0.69                  |                            |
|                                                 | 1ojz                                       | 49.3                          | 0.93                        | 0.82                  | Good                       |
|                                                 | 2a9k                                       | 48.22                         | 5.13                        | 0.28                  |                            |
| EFV toxin                                       | 1qs2                                       | 46.66                         | 2.07                        | 0.41                  |                            |
|                                                 | 1giq                                       | 45.26                         | 0.93                        | 0.40                  |                            |
|                                                 | 2wn7                                       | 45.59                         | 1.52                        | 0.42                  |                            |
|                                                 | 1og3                                       | 46.47                         | 1.89                        | 0.73                  |                            |
|                                                 | 2gwl                                       | 46.38                         | 0.98                        | 0.68                  |                            |
|                                                 | 1ojz                                       | 45.48                         | 1.92                        | 0.82                  | Fair                       |
|                                                 | 2a9k                                       | 39.91                         | 5.38                        | 0.31                  |                            |
|                                                 | 1qs2                                       | 46.25                         | 1.25                        | 0.40                  |                            |
| TccC5                                           | 1giq                                       | 47.17                         | 1.24                        | 0.42                  |                            |
|                                                 | 2wn7                                       | 35.07                         | 3.58                        | 0.36                  |                            |
|                                                 | 1og3                                       | 32.32                         | 3.69                        | 0.51                  |                            |
|                                                 | 2gwl                                       | 47.69                         | 1.67                        | 0.70                  |                            |
|                                                 | 1ojz                                       | 44.89                         | 0.83                        | 0.80                  | Good                       |
|                                                 | 2a9k                                       | 43.94                         | 5.76                        | 0.29                  |                            |
|                                                 | 1qs2                                       | 46.77                         | 1.29                        | 0.43                  |                            |
|                                                 | 1giq                                       | 47.54                         | 1.25                        | 0.48                  |                            |
| Vis toxin                                       | 2wn7                                       | 42.42                         | 2.29                        | 0.46                  |                            |
|                                                 | 1og3                                       | 43.81                         | 0.83                        | 0.88                  |                            |
|                                                 | 2gwl                                       | 41.02                         | 0.93                        | 0.84                  |                            |

<sup>a</sup> Global distance test total score (GDT-TS) counts C $\alpha$  pairs that have a distance <1, 2, 4, 8 Å after overlap. Larger values are better. Values >40 imply correct fold and values >84 imply reliable use in molecular replacement. The low GDT-TS for EFV toxin full-length may reflect our inability to predict orientation of the component domains.

<sup>b</sup> Compared to the native structure; smaller is better.

<sup>c</sup> Template modeling score (TM-score) values greater than 0.5 suggests correct topology.

<sup>d</sup> For catalytic domains, based on sequence identity (<=20% “poor”, 21-25% “fair”, 26-30% “good”, 31-35% “high”, >=36% “excellent”)

<sup>e</sup> Better coverage than 2bwr

**Table S3. Summary statistics for model geometry**

| <b>Full-length</b>                              |       |       |          |       |       |       |              |
|-------------------------------------------------|-------|-------|----------|-------|-------|-------|--------------|
|                                                 | Ideal | Chelt | Certhrax | Mav   | EFV   | TccC5 | Vis          |
| Rotamer outliers (%)                            | <1    | 5.28  | 6.51     | 2.67  | 4.40  | 4.91  | see<br>below |
| Ramachandran outliers                           | <0.2  | 2.41  | 5.70     | 2.67  | 1.65  | 7.48  |              |
| Ramachandran favored                            | >98   | 88.81 | 87.55    | 87.97 | 90.72 | 84.38 |              |
| C $\beta$ deviations >0.25Å                     | 0     | 7     | 35       | 4     | 6     | 7     |              |
| Residues with bad bonds                         | <1    | 0.00  | 0.00     | 0.00  | 0.00  | 34.65 |              |
| Residues with bad angles                        | <0.5  | 1.54  | 5.88     | 0.85  | 2.26  | 34.43 |              |
| <b>Catalytic domain (NAD<sup>+</sup>-bound)</b> |       |       |          |       |       |       |              |
|                                                 | Ideal | Chelt | Certhrax | Mav   | EFV   | TccC5 | Vis          |
| Rotamer outliers (%)                            | <1    | 4.52  | 13.15    | 2.88  | 9.09  | 7.14  | 11.62        |
| Ramachandran outliers                           | <0.2  | 0.55  | 4.74     | 4.85  | 4.40  | 5.92  | 4.80         |
| Ramachandran favored                            | >98   | 98.36 | 87.07    | 88.48 | 85.71 | 85.21 | 89.52        |
| C $\beta$ deviations >0.25Å                     | 0     | 1     | 10       | 3     | 4     | 7     | 5            |
| Residues with bad bonds                         | <1    | 0.00  | 0.00     | 0.00  | 0.00  | 3.51  | 0.87         |
| Residues with bad angles                        | <0.5  | 0.54  | 2.56     | 2.40  | 4.89  | 9.36  | 3.90         |

# Dataset S1



## Chelt

| target name    | len | blast | pdb-psi | pdb   | scop                          | cath                                     | interpret                | rank | 3djury |
|----------------|-----|-------|---------|-------|-------------------------------|------------------------------------------|--------------------------|------|--------|
| A2PU44         | 601 | 1E-66 | 2E-80   | 1lt4A | d.166.1.1                     | 3.90.210.10                              | ADPRT toxin              | 1    | 178.12 |
| A2PU44_1-300   | 300 | 2E-65 | 3E-78   | 1lt4A | d.166.1.1                     | 3.90.210.10                              | ADPRT toxin              | 1    | 158    |
| A2PU44_1-350   | 350 | 3E-65 | 5E-76   | 1lt4A | d.166.1.1                     | 3.90.210.10                              | ADPRT toxin              | 1    | 157.75 |
| A2PU44_1-600   | 600 | 4E-65 | 5E-84   | 1lt4A | d.166.1.1                     | 3.90.210.10                              | ADPRT toxin              | 1    | 156.5  |
| A2PU44_1-250   | 250 | 8E-66 | 4E-78   | 1lt4A | d.166.1.1                     | 3.90.210.10                              | ADPRT toxin              | 1    | 152.75 |
| A2PU44_1-400   | 400 | 3E-65 | 4E-73   | 1lt4A | d.166.1.1                     | 3.90.210.10                              | ADPRT toxin              | 1    | 152.75 |
| A2PU44_1-550   | 550 | 4E-65 | 4E-53   | 1lt4A | d.166.1.1                     | 3.90.210.10                              | ADPRT toxin              | 1    | 150.25 |
| A2PU44_1-450   | 450 | 5E-65 | 1E-57   | 1lt4A | d.166.1.1                     | 3.90.210.10                              | ADPRT toxin              | 1    | 147.75 |
| A2PU44_1-500   | 500 | 5E-65 | 6E-53   | 1s5eA | d.166.1.1                     | 3.90.210.10                              | ADPRT toxin              | 1    | 143.25 |
| A2PU44_1-216   | 216 | 4E-64 | 1E-69   | 1lt4A | d.166.1.1                     | 3.90.210.10                              | ADPRT toxin              | 1    | 141.25 |
| A2PU44_1-200   | 200 | 2E-60 | 3E-64   | 1xtcA | d.166.1.1                     | 3.90.210.10                              | ADPRT toxin              | 1    | 134    |
| A2PU44_1-179   | 179 | 2E-54 | 3E-52   | 1xtcA | d.166.1.1                     | 3.90.210.10                              | ADPRT toxin              | 1    | 131    |
| A2PU44_101-250 | 150 | 2E-37 | 1E-52   | 1lt3A | d.166.1.1                     | 3.90.210.10                              | ADPRT toxin              | 1    | 98.75  |
| A2PU44_1-150   | 150 | 3E-47 | 4E-43   | 1xtcA | d.166.1.1                     | 3.90.210.10                              | ADPRT toxin              | 1    | 96.5   |
| A2PU44_101-200 | 100 | 3E-31 | 3E-39   | 1ltsA | d.166.1.1                     | 3.90.210.10                              | ADPRT toxin              | 1    | 74.75  |
| A2PU44_51-150  | 100 | 5E-38 | 7E-39   | 1tiiA | d.166.1.1                     | 3.90.210.10                              | ADPRT toxin              | 1    | 74.25  |
| A2PU44_151-250 | 100 | 1E-16 | 2E-45   | 1lt3A | d.166.1.1                     | 3.90.210.10                              | ADPRT toxin              | 1    | 62.5   |
| A2PU44_1-100   | 100 | 2E-24 | 5E-38   | 1xtcA | d.166.1.1                     | 3.90.210.10                              | ADPRT toxin              | 1    | 59     |
| A2PU44_101-175 | 75  | 2E-24 | 7E-27   | 1tiiA | d.166.1.1                     | 3.90.210.10                              | ADPRT toxin              | 1    | 55.5   |
| A2PU44_51-125  | 75  | 5E-27 | 2E-33   | 1tiiA | d.166.1.1                     | 3.90.210.10                              | ADPRT toxin              | 1    | 55.5   |
| A2PU44_151-225 | 75  | 2E-15 | 3E-32   | 1tiiA | d.166.1.1                     | 3.90.210.10                              | ADPRT toxin              | 1    | 46     |
| A2PU44_180-240 | 61  | 3E-09 | 7E-29   | 1s5eA | d.166.1.1                     | 3.90.210.10                              | ADPRT toxin              | 1    | 42.33  |
| A2PU44_1-75    | 75  | 5E-15 | 1E-25   | 1ltiA | d.166.1.1                     | 3.90.210.10                              | ADPRT toxin              | 1    | 40.5   |
| A2PU44_101-150 | 50  | 9E-17 | 1E-18   | 1tiiA | d.166.1.1                     | 3.90.210.10                              | ADPRT toxin              | 1    | 37.5   |
| A2PU44_76-125  | 50  | 3E-15 | 6E-17   | 1tiiA | d.166.1.1                     | 3.90.210.10                              | ADPRT toxin              | 1    | 37.5   |
| A2PU44_151-200 | 50  | 8E-11 | 5E-25   | 1xtcA | d.166.1.1                     | 3.90.210.10                              | ADPRT toxin              | 1    | 37.5   |
| A2PU44_126-175 | 50  | 1E-12 | 4E-22   | 1tiiA | d.166.1.1                     | 3.90.210.10                              | ADPRT toxin              | 1    | 37     |
| A2PU44_51-100  | 50  | 5E-15 | 9E-20   | 1tiiA | d.166.1.1                     | 3.90.210.10                              | ADPRT toxin              | 1    | 36.75  |
| A2PU44_251-550 | 300 | 0.45  | 4E-15   | 2bwmA | b.69.8                        | 2.130.10                                 | lectin                   | 2    | 152    |
| A2PU44_301-601 | 301 | 0.27  | 5E-14   | 2bwmA | b.69.8                        | 2.130.10                                 | lectin                   | 2    | 142    |
| A2PU44_241-601 | 361 | 0.67  | 7E-17   | 2bwrA | b.69.8                        | 2.130.10                                 | lectin                   | 2    | 141.25 |
| A2PU44_290-601 | 312 | 0.26  | 2E-14   | 2bwmA | b.69.8                        | 2.130.10                                 | lectin                   | 2    | 138.33 |
| A2PU44_201-450 | 250 | 0.12  | 3E-18   | 3ijeA | b.69.8, b.1.15                | 2.130.10, 2.60.40                        | protein binding          | 2    | 114    |
| A2PU44_351-601 | 251 | 0.21  | 4E-31   | 2bwrA | b.69.8                        | 2.130.10                                 | lectin                   | 2    | 99.75  |
| A2PU44_301-500 | 200 | 0.21  | 3E-14   | 2bwmA | b.69.8                        | 2.130.10                                 | lectin                   | 2    | 93.75  |
| A2PU44_151-350 | 200 | 4E-16 | 5E-35   | 2bwmA | b.69.8                        | 2.130.10                                 | lectin                   | 2    | 75.5   |
| A2PU44_401-601 | 201 | 0.16  | 1.9     | 3ijeA | b.69.8, b.1.15                | 2.130.10, 2.60.40                        | protein binding          | 2    | 73.5   |
| A2PU44_218-376 | 159 | 0.24  | 8E-08   | 2bwrA | b.69.8                        | 2.130.10                                 | lectin                   | 2    | 56.25  |
| A2PU44_201-350 | 150 | 0.032 | 1.5     | 2bwmA | b.69.8                        | 2.130.10                                 | lectin                   | 2    | 53.5   |
| A2PU44_401-550 | 150 | 0.12  | 0.84    | 2bwrA | b.69.8                        | 2.130.10                                 | lectin                   | 2    | 51.25  |
| A2PU44_301-450 | 150 | 0.42  | 2E-06   | 3ijeA | b.69.8, b.1.15                | 2.130.10, 2.60.40                        | protein binding          | 2    | 51     |
| A2PU44_251-350 | 100 | 0.081 | 0.77    | 3ijeA | b.69.8, b.1.15                | 2.130.10, 2.60.40                        | protein binding          | 2    | 30     |
| A2PU44_451-601 | 151 | 1.7   | 0.027   | 1svpA | b.47.1.3                      | 2.40.10.10, 2.40.10.10                   | viral protein            |      | 48.25  |
| A2PU44_501-600 | 100 | 0.93  | 0.15    | 1c76A | d.15.5.1                      | 3.10.20.130                              | hydrolase                |      | 29.75  |
| A2PU44_301-400 | 100 | 0.28  | 0.021   | 1jv2A | b.1.15.1, b.1.15.1, b.1.15.1  | 2.130.10.130, 2.60.40.1460, 2.60.40.1510 | cell adhesion            |      | 24     |
| A2PU44_502-601 | 100 | 1     | 0.2     | 1nezG | b.1.1.1                       | 2.60.40.10                               | immune system            |      | 18.25  |
| A2PU44_501-601 | 101 | 0.98  | 0.17    | 3b9kA | b.1.1                         | 2.60.40.10                               | immune system            |      | 18.25  |
| A2PU44_451-550 | 100 | 1     | 0.35    | 2erjD | a.26.1.2                      | 1.20.1250.10                             | immune system / cytokine |      | 17.75  |
| A2PU44_401-500 | 100 | 0.073 | 0.31    | 3kivA | g.14.1.1                      | 2.40.20.10                               | kringle                  |      | 17.75  |
| A2PU44_377-501 | 125 | 0.086 | 1.7     | 1n02A | b.89.1.1                      | 2.30.60.10                               | virus/viral protein      |      | 16     |
| A2PU44_501-575 | 75  | 0.67  | 0.32    | 1nyqA | c.51.1.1, d.15.10.1, d.67.1.1 | 3.40.50, 3.10.20, ?                      | ligase                   |      | 16     |
| A2PU44_351-425 | 75  | 0.89  | 1.5     | 1c8dA | b.121.5.2                     | 2.170.30.10                              | viral protein            |      | 15.5   |
| A2PU44_201-275 | 75  | 2.3   | 1.7     | 3lkeA | c.14.1                        | 3.90.226                                 | lyase                    |      | 13.25  |
| A2PU44_251-325 | 75  | 0.43  | 0.19    | 1xq4A | b.1.23.1                      | 2.60.40.1470                             | structural genomics      |      | 12.5   |
| A2PU44_201-300 | 100 | 1.8   | 1.7     | 1qpxA | b.1.11.1, b.7.2.1,            | 2.60.40.360, 2.60.40.1070                | chaperone                |      | 12.25  |

|                |     |      |       |       |                               |                                                  |                          |       |
|----------------|-----|------|-------|-------|-------------------------------|--------------------------------------------------|--------------------------|-------|
| A2PU44_201-250 | 50  | 3    | 2     | 2qadA | d.172.1                       | 2.170.40                                         | viral protein/immune     | 12.25 |
| A2PU44_351-450 | 100 | 1.4  | 0.87  | 1c8dA | b.121.5.2                     | 2.170.30.10                                      | viral protein            | 12    |
| A2PU44_351-400 | 50  | 0.79 | 2     | 2htyA | b.68.1                        | 2.120.10.10                                      | hydrolase                | 12    |
| A2PU44_451-525 | 75  | 1.1  | 0.21  | 3ed8A | d.22.1                        | 2.40.155.10                                      | luminescent protein      | 12    |
| A2PU44_251-300 | 50  | 2.4  | 2.7   | 1j7mA | g.14.1.2                      | 2.10.10.10                                       | hydrolase                | 11.5  |
| A2PU44_226-275 | 50  | 4    | 1.8   | 2jx5A | d.15.1                        | 3.10.20                                          | ribosomal protein        | 11.5  |
| A2PU44_526-575 | 50  | 10   | 0.75  | 3qwjA | b.1.18, a.86.1, a.85.1        | 2.70, 2.60.40; 1.10.1280; 1.20.1370              | oxygen transport         | 11.25 |
| A2PU44_551-600 | 50  | 6.5  | 2     | 3js9A | d.58.6                        | 3.30.70                                          | transferase              | 10.5  |
| A2PU44_551-601 | 51  | 6.7  | 2     | 3js9A | d.58.6                        | 3.30.70                                          | transferase              | 10.5  |
| A2PU44_501-550 | 50  | 1.2  | 0.32  | 1qf6A | c.51.1.1, d.15.10.1, d.67.1.1 | 3.10.20.30, 3.30.980.10, 3.30.54.20              | ligase/rna               | 10.25 |
| A2PU44_301-375 | 75  | 0.87 | 0.01  | 1v9hA | d.124.1.1                     | 3.90.730.10                                      | hydrolase                | 10.25 |
| A2PU44_326-375 | 50  | 0.94 | 0.011 | 3eswA | d.3.1                         | 3.90.70, 3.90.260, 3.40.532, 3.90.1360, 3.40.395 | hydrolase                | 10.25 |
| A2PU44_376-425 | 50  | 5.8  | 6     | 1e8pA | g.55.1.1                      | 3.90.1220.10                                     | cellulose docking domain | 10    |
| A2PU44_276-325 | 50  | 1.5  | 0.35  | 2e56A | b.1.18                        | 2.70, 2.60.40                                    | lipid binding            | 10    |
| A2PU44_241-289 | 49  | 2.4  | 1.5   | 1mr8A | a.39.1.2                      | 1.10.238.10                                      | metal transport          | 7     |

**Certhrax**

| target name    | len | blast    | pdb-psi  | pdb   | scop                            | cath                                   | interpret             | rank | 3djury |
|----------------|-----|----------|----------|-------|---------------------------------|----------------------------------------|-----------------------|------|--------|
| Q4MV79_1-450   | 450 | 7E-35    | 1E-92    | 1j7nA | d.92.1.14, d.92.1.14, d.166.1.1 | 3.40.390.10, 3.90.176.10, 1.10.2030.10 | anthrax lethal factor | 1    | 239    |
| Q4MV79_1-400   | 400 | 4E-35    | 1E-92    | 1j7nA | d.92.1.14, d.92.1.14, d.166.1.1 | 3.40.390.10, 3.90.176.10, 1.10.2030.10 | anthrax lethal factor | 1    | 222.75 |
| Q4MV79_1-450   | 420 | 6E-35    | 2E-95    | 1j7nA | d.92.1.14, d.92.1.14, d.166.1.1 | 3.40.390.10, 3.90.176.10, 1.10.2030.10 | anthrax lethal factor | 1    | 222    |
| Q4MV79         | 476 | 1E-39    | 6E-91    | 1j7nA | d.92.1.14, d.92.1.14, d.166.1.1 | 3.40.390.10, 3.90.176.10, 1.10.2030.10 | anthrax lethal factor | 1    | 217.25 |
| Q4MV79_1-350   | 350 | 4E-35    | 1E-100   | 1j7nA | d.92.1.14, d.92.1.14, d.166.1.1 | 3.40.390.10, 3.90.176.10, 1.10.2030.10 | anthrax lethal factor | 1    | 200.75 |
| Q4MV79_1-300   | 300 | 5E-35    | 3E-93    | 1j7nA | d.92.1.14, d.92.1.14, d.166.1.1 | 3.40.390.10, 3.90.176.10, 1.10.2030.10 | anthrax lethal factor | 1    | 189.25 |
| Q4MV79_1-250   | 250 | 1E-34    | 4E-83    | 1j7nA | d.92.1.14, d.92.1.14, d.166.1.1 | 3.40.390.10, 3.90.176.10, 1.10.2030.10 | anthrax lethal factor | 1    | 170.75 |
| Q4MV79_1-254   | 254 | 1E-34    | 3E-83    | 1PWUA | d.92.1.14, d.92.1.14, d.166.1.1 | 3.40.390.10, 3.90.176.10, 1.10.2030.10 | anthrax lethal factor | 1    | 136    |
| Q4MV79_1-200   | 200 | 6E-27    | 2E-64    | 1j7nA | d.92.1.14, d.92.1.14, d.166.1.1 | 3.40.390.10, 3.90.176.10, 1.10.2030.10 | anthrax lethal factor | 1    | 135    |
| Q4MV79_1-150   | 150 | 1E-21    | 2E-53    | 1j7nA | d.92.1.14, d.92.1.14, d.166.1.1 | 3.40.390.10, 3.90.176.10, 1.10.2030.10 | anthrax lethal factor | 1    | 109.25 |
| Q4MV79_101-250 | 150 | 9E-15    | 3E-41    | 1j7nA | d.92.1.14, d.92.1.14, d.166.1.1 | 3.40.390.10, 3.90.176.10, 1.10.2030.10 | anthrax lethal factor | 1    | 95.25  |
| Q4MV79_151-350 | 200 | 5E-12    | 9E-46    | 1j7nA | d.92.1.14, d.92.1.14, d.166.1.1 | 3.40.390.10, 3.90.176.10, 1.10.2030.10 | anthrax lethal factor | 1    | 79.25  |
| Q4MV79_1-100   | 100 | 1E-15    | 4E-36    | 1j7nA | d.92.1.14, d.92.1.14, d.166.1.1 | 3.40.390.10, 3.90.176.10, 1.10.2030.10 | anthrax lethal factor | 1    | 74.5   |
| Q4MV79_51-150  | 100 | 1E-09    | 1E-31    | 1j7nA | d.92.1.14, d.92.1.14, d.166.1.1 | 3.40.390.10, 3.90.176.10, 1.10.2030.10 | anthrax lethal factor | 1    | 71.5   |
| Q4MV79_151-250 | 100 | 1E-11    | 6E-33    | 1j7nA | d.92.1.14, d.92.1.14, d.166.1.1 | 3.40.390.10, 3.90.176.10, 1.10.2030.10 | anthrax lethal factor | 1    | 70.75  |
| Q4MV79_1-75    | 75  | 5E-10    | 1E-24    | 1pwuA | d.92.1.14, d.92.1.14, d.166.1.1 | 3.40.390.10, 3.90.176.10, 1.10.2030.10 | anthrax lethal factor | 1    | 56.25  |
| Q4MV79_101-200 | 100 | 2E-07    | 6E-27    | 1pwuA | d.92.1.14, d.92.1.14, d.166.1.1 | 3.40.390.10, 3.90.176.10, 1.10.2030.10 | anthrax lethal factor | 1    | 55.25  |
| Q4MV79_151-225 | 75  | 2E-11    | 9E-28    | 1j7nA | d.92.1.14, d.92.1.14, d.166.1.1 | 3.40.390.10, 3.90.176.10, 1.10.2030.10 | anthrax lethal factor | 1    | 53.5   |
| Q4MV79_51-125  | 75  | 6E-09    | 6E-24    | 1j7nA | d.92.1.14, d.92.1.14, d.166.1.1 | 3.40.390.10, 3.90.176.10, 1.10.2030.10 | anthrax lethal factor | 1    | 52.25  |
| Q4MV79_201-275 | 75  | 0.005    | 0.004    | 1j7nA | d.92.1.14, d.92.1.14, d.166.1.1 | 3.40.390.10, 3.90.176.10, 1.10.2030.10 | anthrax lethal factor | 1    | 38.5   |
| Q4MV79_176-225 | 50  | 2E-07    | 1E-19    | 1j7nA | d.92.1.14, d.92.1.14, d.166.1.1 | 3.40.390.10, 3.90.176.10, 1.10.2030.10 | anthrax lethal factor | 1    | 37.5   |
| Q4MV79_26-75   | 50  | 0.000001 | 1E-16    | 1j7nA | d.92.1.14, d.92.1.14, d.166.1.1 | 3.40.390.10, 3.90.176.10, 1.10.2030.10 | anthrax lethal factor | 1    | 37.5   |
| Q4MV79_1-50    | 50  | 7E-07    | 3E-15    | 1j7nA | d.92.1.14, d.92.1.14, d.166.1.1 | 3.40.390.10, 3.90.176.10, 1.10.2030.10 | anthrax lethal factor | 1    | 37.5   |
| Q4MV79_51-100  | 50  | 0.001    | 0.0002   | 1j7nA | d.92.1.14, d.92.1.14, d.166.1.1 | 3.40.390.10, 3.90.176.10, 1.10.2030.10 | anthrax lethal factor | 1    | 36.25  |
| Q4MV79_201-250 | 50  | 0.008    | 0.005    | 1j7nA | d.92.1.14, d.92.1.14, d.166.1.1 | 3.40.390.10, 3.90.176.10, 1.10.2030.10 | anthrax lethal factor | 1    | 24.5   |
| Q4MV79_151-200 | 50  | 0.0007   | 0.0003   | 1j7nA | d.92.1.14, d.92.1.14, d.166.1.1 | 3.40.390.10, 3.90.176.10, 1.10.2030.10 | anthrax lethal factor | 1    | 23.5   |
| Q4MV79_76-125  | 50  | 0.00001  | 0.000005 | 1j7nA | d.92.1.14, d.92.1.14, d.166.1.1 | 3.40.390.10, 3.90.176.10, 1.10.2030.10 | anthrax lethal factor | 1    | 23     |
| Q4MV79_251-476 | 226 | 4E-18    | 3E-36    | 1giqA | d.166.1.1, d.166.1.1            | 3.90.176.10, 3.90.176.10,              | ADPRT toxin           | 2    | 143    |
| Q4MV79_201-450 | 250 | 9E-20    | 3E-35    | 1giqA | d.166.1.1, d.166.1.1            | 3.90.176.10, 3.90.176.10,              | ADPRT toxin           | 2    | 140.25 |
| Q4MV79_301-476 | 176 | 5E-14    | 1E-33    | 2wn4A | d.166.1.1                       | 3.90.176, 3.90.175, 3.90.210           | ADPRT toxin           | 2    | 112    |
| Q4MV79_301-450 | 150 | 4E-14    | 7E-32    | 1giqA | d.166.1.1, d.166.1.1            | 3.90.176.10, 3.90.176.10,              | ADPRT toxin           | 2    | 104.5  |
| Q4MV79_351-476 | 126 | 3E-09    | 2E-22    | 2wn4A | d.166.1.1                       | 3.90.176, 3.90.175, 3.90.210           | ADPRT toxin           | 2    | 76.5   |
| Q4MV79_201-350 | 150 | 6E-11    | 4E-23    | 1qs1A | d.166.1.1, d.166.1.1            | 3.90.176.10, 3.90.176.10,              | ADPRT toxin           | 2    | 70.5   |
| Q4MV79_301-400 | 100 | 0.00001  | 2E-26    | 3bw8A | d.166.1.1                       | 3.90.176.10                            | ADPRT toxin           | 2    | 69     |
| Q4MV79_351-450 | 100 | 3E-09    | 8E-22    | 1qs1A | d.166.1.1, d.166.1.1            | 3.90.176.10, 3.90.176.10,              | ADPRT toxin           | 2    | 66     |
| Q4MV79_251-350 | 100 | 1E-10    | 1E-22    | 1giqA | d.166.1.1, d.166.1.1            | 3.90.176.10, 3.90.176.10,              | ADPRT toxin           | 2    | 64     |
| Q4MV79_390-476 | 87  | 0.00006  | 1E-18    | 3buzA | d.166.1.1, d.166.1.1            | 3.90.176.10, 3.90.176.10,              | ADPRT toxin           | 2    | 55.5   |
| Q4MV79_301-375 | 75  | 0.0008   | 0.003    | 2wn4A | d.166.1.1                       | 3.90.176, 3.90.175, 3.90.210           | ADPRT toxin           | 2    | 48.25  |
| Q4MV79_351-425 | 75  | 0.002    | 4E-19    | 2a78B | d.166.1.1                       | 3.90.176.10                            | ADPRT toxin           | 2    | 47.75  |
| Q4MV79_401-475 | 75  | 0.000003 | 2E-15    | 1qs1A | d.166.1.1, d.166.1.1            | 3.90.176.10, 3.90.176.10,              | ADPRT toxin           | 2    | 46.5   |
| Q4MV79_401-476 | 76  | 0.000003 | 2E-15    | 1qs1A | d.166.1.1, d.166.1.1            | 3.90.176.10, 3.90.176.10,              | ADPRT toxin           | 2    | 46     |
| Q4MV79_201-300 | 100 | 0.00002  | 2E-16    | 1giqA | d.166.1.1, d.166.1.1            | 3.90.176.10, 3.90.176.10,              | ADPRT toxin           | 2    | 43.5   |
| Q4MV79_251-325 | 75  | 0.00003  | 2E-13    | 1giqA | d.166.1.1, d.166.1.1            | 3.90.176.10, 3.90.176.10,              | ADPRT toxin           | 2    | 42.5   |
| Q4MV79_340-389 | 50  | 0.8      | 0.16     | 2bovB | d.166.1.1                       | 3.90.176.10                            | ADPRT toxin           | 2    | 40.33  |
| Q4MV79_251-300 | 50  | 0.00006  | 1E-13    | 1qs1A | d.166.1.1, d.166.1.1            | 3.90.176.10, 3.90.176.10,              | ADPRT toxin           | 2    | 36.75  |
| Q4MV79_401-450 | 50  | 0.000005 | 8E-15    | 1qs1A | d.166.1.1, d.166.1.1            | 3.90.176.10, 3.90.176.10,              | ADPRT toxin           | 2    | 36.5   |
| Q4MV79_326-375 | 50  | 0.39     | 0.1      | 1giqA | d.166.1.1, d.166.1.1            | 3.90.176.10, 3.90.176.10,              | ADPRT toxin           | 2    | 36.25  |
| Q4MV79_376-425 | 50  | 0.089    | 0.05     | 2wn4A | d.166.1.1                       | 3.90.176, 3.90.175, 3.90.210           | ADPRT toxin           | 2    | 36     |
| Q4MV79_351-400 | 50  | 0.4      | 0.055    | 1giqA | d.166.1.1, d.166.1.1            | 3.90.176.10, 3.90.176.10,              | ADPRT toxin           | 2    | 34.5   |
| Q4MV79_301-350 | 50  | 0.002    | 0.007    | 2j3vA | d.166.1.1                       | 3.90.176, 3.90.175, 3.90.210           | ADPRT toxin           | 2    | 24     |

|                |    |       |        |       |                                |                                         |                   |   |       |
|----------------|----|-------|--------|-------|--------------------------------|-----------------------------------------|-------------------|---|-------|
| Q4MV79_276-325 | 50 | 4.9   | 1.6    | 3bw8A | d.166.1.1                      | 3.90.176.10                             | ADPRT toxin       | 2 | 21.25 |
| Q4MV79_426-475 | 50 | 1.5   | 1.4    | 2a78B | d.166.1.1                      | 3.90.176.10                             | ADPRT toxin       | 2 | 10.5  |
| Q4MV79_101-175 | 75 | 0.003 | 0.0008 | 2dhrA | c.37.1, a.269.1                | 3.40.50, 3.40.850, 3.40.1140, 1.10.8; ? | hydrolase         |   | 25.25 |
| Q4MV79_101-150 | 50 | 1.3   | 0.64   | 1r7rA | b.52.2.3, c.37.1.20, c.37.1.20 | 2.40.40.20, 3.10.330.10, 3.40.50.300    | transport protein |   | 21.75 |

Mav toxin

| target name    | len | blast  | pdb-psi  | pdb   | scop                 | cath                         | interpret                    | Rank | 3djury |
|----------------|-----|--------|----------|-------|----------------------|------------------------------|------------------------------|------|--------|
| AOQL15_612-825 | 214 | 0.002  | 8E-43    | 1gxyA | d.166.1.3            | 3.90.176.10                  | ADPRT toxin                  | 1    | 125.75 |
| AOQL15_640-825 | 186 | 0.0006 | 8E-31    | 1gjqA | d.166.1.1, d.166.1.1 | 3.90.176.10, 3.90.176.10     | ADPRT toxin                  | 1    | 124.83 |
| AOQL15_601-825 | 225 | 0.003  | 9E-43    | 2j3vA | d.166.1.1            | 3.90.176, 3.90.175, 3.90.210 | ADPRT toxin                  | 1    | 120.5  |
| AOQL15_675-825 | 151 | 0.0002 | 2E-28    | 2wn4A | d.166.1.1            | 3.90.176, 3.90.175, 3.90.210 | ADPRT toxin                  | 1    | 107.5  |
| AOQL15_676-825 | 150 | 0.0002 | 7E-28    | 2wn4A | d.166.1.1            | 3.90.176, 3.90.175, 3.90.210 | ADPRT toxin                  | 1    | 107.5  |
| AOQL15_676-825 | 150 | 0.0002 | 3E-25    | 2wn4A | d.166.1.1            | 3.90.176, 3.90.175, 3.90.210 | ADPRT toxin                  | 1    | 106    |
| AOQL15_515-825 | 311 | 0.008  | 7E-21    | 3buzA | d.166.1.1, d.166.1.1 | 3.90.176.10, 3.90.176.10     | ADPRT toxin                  | 1    | 103.25 |
| AOQL15_531-825 | 295 | 0.005  | 5E-34    | 2bovB | d.166.1.1            | 3.90.176.10                  | ADPRT toxin                  | 1    | 101    |
| AOQL15_451-825 | 375 | 0.017  | 9E-23    | 3bw8A | d.166.1.1            | 3.90.176.10                  | ADPRT toxin                  | 1    | 99     |
| AOQL15_601-800 | 200 | 0.014  | 2E-38    | 1gxyA | d.166.1.3            | 3.90.176.10                  | ADPRT toxin                  | 1    | 97.5   |
| AOQL15_501-825 | 325 | 0.009  | 6E-19    | 2wn4A | d.166.1.1            | 3.90.176, 3.90.175, 3.90.210 | ADPRT toxin                  | 1    | 97.25  |
| AOQL15_696-825 | 130 | 0.0001 | 7E-25    | 2wn4A | d.166.1.1            | 3.90.176, 3.90.175, 3.90.210 | ADPRT toxin                  | 1    | 91     |
| AOQL15_501-800 | 300 | 0.03   | 3E-21    | 2wn4A | d.166.1.1            | 3.90.176, 3.90.175, 3.90.210 | ADPRT toxin                  | 1    | 90.75  |
| AOQL15_383-825 | 443 | 0.025  | 8E-20    | 2a78B | d.166.1.1            | 3.90.176.10                  | ADPRT toxin                  | 1    | 81     |
| AOQL15_701-825 | 125 | 0.0001 | 5E-23    | 2wn4A | d.166.1.1            | 3.90.176, 3.90.175, 3.90.210 | ADPRT toxin                  | 1    | 79.33  |
| AOQL15_401-825 | 425 | 0.02   | 4E-19    | 2bovB | d.166.1.1            | 3.90.176.10                  | ADPRT toxin                  | 1    | 79     |
| AOQL15_701-800 | 100 | 0.0007 | 3E-25    | 1qs1A | d.166.1.1, d.166.1.1 | 3.90.176.10, 3.90.176.10     | ADPRT toxin                  | 1    | 70.75  |
| AOQL15_292-825 | 534 | 0.033  | 2E-14    | 2wn4A | d.166.1.1            | 3.90.176, 3.90.175, 3.90.210 | ADPRT toxin                  | 1    | 69     |
| AOQL15_728-825 | 98  | 0.04   | 8E-19    | 1qs1A | d.166.1.1, d.166.1.1 | 3.90.176.10, 3.90.176.10     | ADPRT toxin                  | 1    | 66.75  |
| AOQL15_736-825 | 90  | 0.042  | 5E-17    | 3buzA | d.166.1.1, d.166.1.1 | 3.90.176.10, 3.90.176.10     | ADPRT toxin                  | 1    | 63.75  |
| AOQL15         | 825 | 0.008  | 2E-20    | 2bovB | d.166.1.1            | 3.90.176.10                  | ADPRT toxin                  | 1    | 59.8   |
| AOQL15_651-750 | 100 | 0.43   | 0.000004 | 2a78B | d.166.1.1            | 3.90.176.10                  | ADPRT toxin                  | 1    | 59.75  |
| AOQL15_601-750 | 150 | 0.96   | 1E-07    | 2wn4A | d.166.1.1            | 3.90.176, 3.90.175, 3.90.210 | ADPRT toxin                  | 1    | 56.75  |
| AOQL15_751-825 | 75  | 0.023  | 2E-16    | 2wn4A | d.166.1.1            | 3.90.176, 3.90.175, 3.90.210 | ADPRT toxin                  | 1    | 52.5   |
| AOQL15_701-775 | 75  | 0.37   | 0.00007  | 2wn4A | d.166.1.1            | 3.90.176, 3.90.175, 3.90.210 | ADPRT toxin                  | 1    | 49.5   |
| AOQL15_651-725 | 75  | 0.21   | 0.088    | 1qs1A | d.166.1.1, d.166.1.1 | 3.90.176.10, 3.90.176.10     | ADPRT toxin                  | 1    | 43.5   |
| AOQL15_1-800   | 800 | 0.013  | 1E-16    | 2a78B | d.166.1.1            | 3.90.176.10                  | ADPRT toxin                  | 1    | 42.67  |
| AOQL15_676-725 | 50  | 1      | 0.093    | 1gjqA | d.166.1.1, d.166.1.1 | 3.90.176.10, 3.90.176.10     | ADPRT toxin                  | 1    | 37     |
| AOQL15_751-800 | 50  | 0.032  | 0.006    | 1gxyA | d.166.1.3            | 3.90.176.10                  | ADPRT toxin                  | 1    | 35.25  |
| AOQL15_701-750 | 50  | 6.7    | 1.1      | 2gwlA | d.166.1.1            | 3.90.176, 3.90.175, 3.90.210 | ADPRT toxin                  | 1    | 24     |
| AOQL15_776-825 | 50  | 1.3    | 0.5      | 3bw8A | d.166.1.1            | 3.90.176.10                  | ADPRT toxin                  | 1    | 23     |
| AOQL15_784-825 | 42  | 3.3    | 0.79     | 3bw8A | d.166.1.1            | 3.90.176.10                  | ADPRT toxin                  | 1    | 20     |
| AOQL15_651-700 | 50  | 10     | 1.1      | 1qs1A | d.166.1.1, d.166.1.1 | 3.90.176.10, 3.90.176.10     | ADPRT toxin                  | 1    | 11.5   |
| AOQL15_726-775 | 50  | 1.9    | 2.1      | 1qs1A | d.166.1.1, d.166.1.1 | 3.90.176.10, 3.90.176.10     | ADPRT toxin                  | 1    | 10.75  |
| AOQL15_601-700 | 100 | 3.7    | 0.064    | 1r45A | d.166.1.1            | 3.90.176.10                  | ADPRT toxin                  | 1    | 10.5   |
| AOQL15_145-365 | 221 | 10     | 0.013    | 3g67A | a.7.4, a.238.1       | 1.20.58                      | signaling/chemoreceptor      | 2    | 93     |
| AOQL15_150-440 | 291 | 1.8    | 0.063    | 2btzA | a.29.5, d.122.1      | 1.20.140.20, 3.30.565.10     | transferase                  | 2    | 91.25  |
| AOQL15_95-440  | 346 | 2.9    | 0.008    | 3g67A | a.7.4, a.238.1       | 1.20.58                      | signaling/chemoreceptor      | 2    | 88.5   |
| AOQL15_95-350  | 256 | 10     | 0.004    | 3g67A | a.7.4, a.238.1       | 1.20.58                      | signaling/chemoreceptor      | 2    | 82.75  |
| AOQL15_151-350 | 200 | 5.7    | 0.015    | 2efrA | a.114.1, a.114.1     | 1.20.1000                    | tropomyosin / leucine zipper | 2    | 77.75  |
| AOQL15_150-350 | 201 | 6.4    | 0.015    | 2efrA | a.114.1, a.114.1     | 1.20.1000                    | tropomyosin / leucine zipper | 2    | 76.25  |
| AOQL15_134-382 | 249 | 10     | 0.011    | 1quuA | a.7.1.1, a.7.1.1     | 1.20.58.60, 1.20.58.60       | spectrin                     | 2    | 75.75  |
| AOQL15_130-350 | 221 | 10     | 0.011    | 2ch7A | h.4.5.1              | ?                            | chemotaxis                   | 2    | 74.25  |
| AOQL15_1-500   | 500 | 4      | 0.28     | 2ch7A | h.4.5.1              | ?                            | chemotaxis                   | 2    | 63.25  |
| AOQL15_130-440 | 311 | 2.4    | 0.038    | 3g67A | a.7.4, a.238.1       | 1.20.58                      | signaling/chemoreceptor      | 2    | 62     |
| AOQL15_190-440 | 251 | 1.5    | 0.024    | 2fxmA | h.1.26.1             | ?                            | contractile protein          | 2    | 59.5   |
| AOQL15_101-250 | 150 | 0.51   | 0.6      | 2vrzA | a.238.1              | 1.20.1270                    | viral protein                | 2    | 59     |
| AOQL15_251-350 | 100 | 7.7    | 0.21     | 2elbA | a.238.1.1, b.55.1.1  | 1.20.1272, 2.30.29           | bar-ph protein binding       | 2    | 55.5   |
| AOQL15_151-225 | 75  | 10     | 1.6      | 2vrzA | a.238.1              | 1.20.1270                    | viral protein                | 2    | 54.75  |
| AOQL15_1-87    | 87  | 1.7    | 2        | 2vrzA | a.238.1              | 1.20.1270                    | viral protein                | 2    | 54.5   |
| AOQL15_1-490   | 490 | 4.3    | 0.29     | 3g67A | a.7.4, a.238.1       | 1.20.58                      | signaling/chemoreceptor      | 2    | 53     |
| AOQL15_190-350 | 161 | 4.4    | 0.048    | 1kmiZ | h.4.11.1             | 1.20.5.590, 1.10.287.500     | signaling protein            | 2    | 52.5   |

|                |     |      |         |       |                             |                                    |                           |   |       |
|----------------|-----|------|---------|-------|-----------------------------|------------------------------------|---------------------------|---|-------|
| AOQL15_201-450 | 250 | 1.7  | 0.005   | 3g67A | a.7.4, a.238.1              | 1.20.58                            | signaling/chemoreceptor   | 2 | 51.25 |
| AOQL15_151-250 | 100 | 1.2  | 0.88    | 2vrzA | a.238.1                     | 1.20.1270                          | viral protein             | 2 | 50.75 |
| AOQL15_1-476   | 476 | 4.2  | 0.021   | 3g67A | a.7.4, a.238.1              | 1.20.58                            | signaling/chemoreceptor   | 2 | 47.5  |
| AOQL15_186-291 | 106 | 1.1  | 0.1     | 2ch7A | h.4.5.1                     | ?                                  | chemotaxis                | 2 | 42    |
| AOQL15_179-286 | 108 | 0.92 | 0.007   | 1sj8A | a.215.1.1, a.216.1.1        | 1.20.1420.10                       | tailin                    | 2 | 39.5  |
| AOQL15_201-400 | 200 | 4.7  | 0.11    | 1hclA | a.7.1.1, a.7.1.1, a.7.1.1   | 1.20.58.60, 1.20.58.60, 1.20.58.60 | triple-helix coiled coil  | 2 | 37    |
| AOQL15_201-300 | 100 | 2.6  | 0.34    | 3fyqA | a.24.9                      | 1.20.120                           | cell adhesion             | 2 | 29.5  |
| AOQL15_201-350 | 150 | 4.2  | 0.063   | 2ch7A | h.4.5.1                     | ?                                  | chemotaxis                | 2 | 25.25 |
| AOQL15_251-550 | 300 | 1.6  | 0.46    | 2ch7A | h.4.5.1                     | ?                                  | chemotaxis                | 2 | 22.25 |
| AOQL15_226-275 | 50  | 10   | 1.8     | 3igtA | a.24.10                     | 1.20.120                           | transferase               | 2 | 10.5  |
| AOQL15_169-695 | 527 | 3    | 1E-33   | 3hkcC | e.29.1                      | ?                                  | RNA polymerase            | 3 | 74.67 |
| AOQL15_190-675 | 486 | 2.6  | 2E-30   | 3hkcC | e.29.1                      | ?                                  | RNA polymerase            | 3 | 73    |
| AOQL15_150-675 | 526 | 2.8  | 1E-37   | 3hkcC | e.29.1                      | ?                                  | RNA polymerase            | 3 | 72    |
| AOQL15_96-674  | 579 | 3.9  | 1E-26   | 3hkcC | e.29.1                      | ?                                  | RNA polymerase            | 3 | 71    |
| AOQL15_95-675  | 581 | 3.8  | 4E-30   | 1i3qA | e.29.1.2                    | ?                                  | RNA polymerase            | 3 | 51    |
| AOQL15_1-675   | 675 | 4.7  | 6E-25   | 3h0gA | e.29.1                      | ?                                  | RNA polymerase            | 3 | 48.33 |
| AOQL15_238-783 | 546 | 3.4  | 1E-26   | 3h0gA | e.29.1                      | ?                                  | RNA polymerase            | 3 | 46.33 |
| AOQL15_1-450   | 450 | 4.1  | 0.024   | 2g38B | a.25.4.2                    | ?                                  | PPE [from PE/PPE complex] | 4 | 71.25 |
| AOQL15_1-350   | 350 | 10   | 0.007   | 2g38B | a.25.4.2                    | ?                                  | PPE [from PE/PPE complex] | 4 | 70.75 |
| AOQL15_1-237   | 237 | 9.1  | 2.2     | 2g38B | a.25.4.2                    | ?                                  | PPE [from PE/PPE complex] | 4 | 55.5  |
| AOQL15_1-250   | 250 | 10   | 1.8     | 1wa8A | a.25.3.1                    | ?                                  | CFP-10                    | 4 | 54.5  |
| AOQL15_1-315   | 315 | 10   | 0.005   | 2g38B | a.25.4.2                    | ?                                  | PPE [from PE/PPE complex] | 4 | 53.75 |
| AOQL15_1-400   | 400 | 10   | 0.004   | 2g38B | a.25.4.2                    | ?                                  | PPE [from PE/PPE complex] | 4 | 53.75 |
| AOQL15_1-300   | 300 | 10   | 0.012   | 2g38B | a.25.4.2                    | ?                                  | PPE [from PE/PPE complex] | 4 | 53.25 |
| AOQL15_1-150   | 150 | 0.86 | 5.3     | 1wa8B | a.25.3.1                    | ?                                  | ESAT-6                    | 5 | 64.5  |
| AOQL15_1-144   | 144 | 0.39 | 0.64    | 1wa8B | a.25.3.1                    | ?                                  | ESAT-6                    | 5 | 64.5  |
| AOQL15_1-100   | 100 | 1.6  | 1.7     | 1wa8B | a.25.3.1                    | ?                                  | ESAT-6                    | 5 | 63.75 |
| AOQL15_1-144   | 144 | 0.83 | 0.99    | 1wa8B | a.25.3.1                    | ?                                  | ESAT-6                    | 5 | 63    |
| AOQL15_1-133   | 133 | 0.8  | 1.2     | 1wa8B | a.25.3.1                    | ?                                  | ESAT-6                    | 5 | 62.75 |
| AOQL15_1-200   | 200 | 2    | 1.8     | 1wa8B | a.25.3.1                    | ?                                  | ESAT-6                    | 5 | 60    |
| AOQL15_1-185   | 185 | 1.3  | 2.4     | 1wa8B | a.25.3.1                    | ?                                  | ESAT-6                    | 5 | 58.75 |
| AOQL15_1-650   | 650 | 5.1  | 6E-31   | 1wa8B | a.25.3.1                    | ?                                  | ESAT-6                    | 5 | 48.33 |
| AOQL15_1-750   | 750 | 5.2  | 4E-08   | 1wa8B | a.25.3.1                    | ?                                  | ESAT-6                    | 5 | 47.67 |
| AOQL15_1-735   | 735 | 5.1  | 0.00004 | 1wa8B | a.25.3.1                    | ?                                  | ESAT-6                    | 5 | 47.67 |
| AOQL15_1-700   | 700 | 5.1  | 1E-21   | 1wa8B | a.25.3.1                    | ?                                  | ESAT-6                    | 5 | 47.67 |
| AOQL15_1-639   | 639 | 5.2  | 1E-29   | 1wa8B | a.25.3.1                    | ?                                  | ESAT-6                    | 5 | 47.67 |
| AOQL15_1-600   | 600 | 4.8  | 3E-18   | 1wa8B | a.25.3.1                    | ?                                  | ESAT-6                    | 5 | 46.67 |
| AOQL15_1-75    | 75  | 1.7  |         | 1wa8B | a.25.3.1                    | ?                                  | ESAT-6                    | 5 | 44.25 |
| AOQL15_1-530   | 530 | 4.3  | 0.049   | 1wa8B | a.25.3.1                    | ?                                  | ESAT-6                    | 5 | 36.25 |
| AOQL15_1-550   | 550 | 4.5  | 9E-15   | 1wa8B | a.25.3.1                    | ?                                  | ESAT-6                    | 5 | 35.75 |
| AOQL15_1-50    | 50  | 3.6  |         | 1wa8B | a.25.3.1                    | ?                                  | ESAT-6                    | 5 | 10.25 |
| AOQL15_251-300 | 50  | 10   | 0.19    | 2npsD | f.5.1                       | ?                                  | transport protein         |   | 31    |
| AOQL15_351-750 | 400 | 2.4  | 1.5     | 2pneA | ?                           | ?                                  | antifreeze protein        |   | 24.67 |
| AOQL15_51-150  | 100 | 1.7  | 0.68    | 1colA | f.1.1.1                     | 1.10.490.30                        | antibacterial protein     |   | 23.5  |
| AOQL15_350-440 | 91  | 0.63 | 0.089   | 1nlrA | b.29.1.11                   | 2.60.120.180                       | endoglucanase             |   | 19.75 |
| AOQL15_301-400 | 100 | 1.9  | 0.7     | 1s0hA | a.1.1.2                     | 1.10.490.10                        | oxygen storage/transport  |   | 19.5  |
| AOQL15_316-407 | 92  | 1.6  | 1.4     | 1lrlA | a.98.1.1, c.7.1.2           | ?                                  | oxidoreductase            |   | 18.5  |
| AOQL15_401-500 | 100 | 10   | 0.15    | 2pneA | ?                           | ?                                  | antifreeze protein        |   | 18.5  |
| AOQL15_408-727 | 320 | 4.9  | 8       | 1m2vB | a.71.2.1, b.2.8.1, c.62.1.2 | 3.40.50.410                        | protein transport         |   | 18.25 |
| AOQL15_201-275 | 75  | 2.2  | 0.16    | 3jvjA | a.29.2                      | 1.20.920                           | signaling protein         |   | 17.5  |
| AOQL15_22-103  | 82  | 3.1  | 3.7     | 1v53A | c.77.1.1                    | 3.40.718.10                        | oxidoreductase            |   | 17.25 |
| AOQL15_351-450 | 100 | 0.69 | 0.057   | 2v4jC | d.203.1.1                   | 3.30.1420.10, 1.10.10.370          | oxidoreductase            |   | 17    |
| AOQL15_423-514 | 92  | 10   | 0.002   | 3bogA | ?                           | ?                                  | antifreeze protein        |   | 16.75 |
| AOQL15_88-168  | 81  | 4.5  | 2.6     | 2d4vA | c.77.1                      | 3.40.718.10                        | oxidoreductase            |   | 16.5  |

|                |     |      |       |       |                               |                                         |                            |  |       |
|----------------|-----|------|-------|-------|-------------------------------|-----------------------------------------|----------------------------|--|-------|
| AOQL15_296-422 | 127 | 0.58 | 0.41  | 1fhiA | d.13.1.1                      | 3.30.428.10                             | nucleotide-binding protein |  | 16    |
| AOQL15_301-375 | 75  | 2.2  | 1.3   | 2o2hA | c.69.1                        | 3.40.50.1820                            | hydrolase                  |  | 16    |
| AOQL15_351-425 | 75  | 0.54 | 0.09  | 2pl5A | c.69.1.40                     | ?                                       | transferase                |  | 15.75 |
| AOQL15_95-155  | 71  | 4.1  |       | 1zzhA | a.3.1, a.3.1                  | 1.10.760                                | oxidoreductase             |  | 14    |
| AOQL15_51-125  | 75  | 1.1  | 1.1   | 1xg6A | b.42.4                        | 2.80.10.50                              | hydrolase inhibitor        |  | 14    |
| AOQL15_101-200 | 100 | 10   | 1.2   | 2wroU | ?                             | ?                                       | ribosome                   |  | 13.5  |
| AOQL15_501-600 | 100 | 10   | 0.037 | 1jj2A | b.34.5.3, b.40.4.5            | 2.30.30.30, 2.40.50.140, 4.10.950.10    | ribosome                   |  | 13.25 |
| AOQL15_51-100  | 50  | 10   |       | 1ajrA | c.67.1.1                      | 3.90.1150.10, 3.40.640.10               | aminotransferase           |  | 12.25 |
| AOQL15_26-75   | 50  | 3.2  |       | 1isoA | c.77.1.1                      | 3.40.718.10                             | oxidoreductase             |  | 12    |
| AOQL15_176-225 | 50  | 5.6  | 2.4   | 1p7tA | c.1.13.1                      | 1.10.1860.10, 2.170.170.11, 3.20.20.360 | lyase                      |  | 11.5  |
| AOQL15_126-175 | 50  | 10   | 1.2   | 3do6A | c.37.1                        | 3.40.50.300, 3.30.1510.10               | ligase                     |  | 11.5  |
| AOQL15_376-425 | 50  | 1.3  | 0.079 | 2pl5A | c.69.1.40                     | ?                                       | transferase                |  | 11.25 |
| AOQL15_351-400 | 50  | 6    |       | 3a21A | c.1.8, b.42.2, b.71.1, b.18.1 | 3.20.20, 2.80.10, 2.60.40, 2.60.120     | hydrolase                  |  | 11.25 |
| AOQL15_477-530 | 54  | 10   | 0.5   | 2an1A | e.52.1                        | ?                                       | transferase                |  | 11    |
| AOQL15_104-178 | 75  | 10   | 3.5   | 1r5eA | a.8.8.1                       | ?                                       | protein binding            |  | 10.75 |
| AOQL15_401-450 | 50  | 10   |       | 1f03A | d.120.1.1                     | 3.10.120.10                             | electron transport         |  | 10.75 |
| AOQL15_326-375 | 50  | 2.2  | 1.1   | 1ipaA | c.116.1.1, d.79.3.3           | 3.30.1330.30, 3.40.1280.10,             | transferase                |  | 10.25 |
| AOQL15_476-525 | 50  | 10   | 1.1   | 2an1A | e.52.1                        | ?                                       | transferase                |  | 10.25 |
| AOQL15_626-675 | 50  | 10   | 2     | 1ea7A | c.41.1.1                      | 3.40.50.200                             | hydrolase                  |  | 10.25 |
| AOQL15_301-350 | 50  | 8    | 3.7   | 2fztA | a.46.3.1                      | ?                                       | structural genomics        |  | 10    |
| AOQL15_151-200 | 50  | 10   | 0.56  | 1onfA | c.3.1.5, c.3.1.5, d.87.1.1    | 3.50.50.60, 3.50.50.60, 3.30.390.30     | oxidoreductase             |  | 10    |

## EFV toxin

| target name    | len | blast    | pdb-psi | pdb   | scop                           | cath                                | interpret                                | rank | 3djury |
|----------------|-----|----------|---------|-------|--------------------------------|-------------------------------------|------------------------------------------|------|--------|
| Q838U8         | 487 | 2E-09    | 1E-25   | 2j3zA | d.166.1.1                      | 3.90.176, 3.90.175, 3.90.210        | ADPRT toxin                              | 1    | 158.12 |
| Q838U8_1-450   | 450 | 0.037    | 2E-18   | 1g1qA | d.166.1.1, d.166.1.1           | 3.90.176.10, 3.90.176.10            | ADPRT toxin                              | 1    | 136    |
| Q838U8_251-487 | 237 | 8E-08    | 3E-36   | 1gxyA | d.166.1.3                      | 3.90.176.10                         | ADPRT toxin                              | 1    | 124.75 |
| Q838U8_262-487 | 226 | 6E-08    | 2E-34   | 1g1qA | d.166.1.1, d.166.1.1           | 3.90.176.10, 3.90.176.10            | ADPRT toxin                              | 1    | 124    |
| Q838U8_301-487 | 187 | 2E-08    | 5E-30   | 1g1qA | d.166.1.1, d.166.1.1           | 3.90.176.10, 3.90.176.10            | ADPRT toxin                              | 1    | 122.75 |
| Q838U8_313-487 | 175 | 1E-08    | 2E-30   | 2wn4A | d.166.1.1                      | 3.90.176, 3.90.175, 3.90.210        | ADPRT toxin                              | 1    | 115.75 |
| Q838U8_328-478 | 151 | 7E-08    | 5E-25   | 1g1qA | d.166.1.1, d.166.1.1           | 3.90.176.10, 3.90.176.10            | ADPRT toxin                              | 1    | 100.75 |
| Q838U8_1-417   | 417 | 0.22     | 6E-13   | 2wn4A | d.166.1.1                      | 3.90.176, 3.90.175, 3.90.210        | ADPRT toxin                              | 1    | 98     |
| Q838U8_301-450 | 150 | 0.003    | 3E-23   | 2wn4A | d.166.1.1                      | 3.90.176, 3.90.175, 3.90.210        | ADPRT toxin                              | 1    | 97.75  |
| Q838U8_201-450 | 250 | 0.017    | 1E-25   | 2wn4A | d.166.1.1                      | 3.90.176, 3.90.175, 3.90.210        | ADPRT toxin                              | 1    | 93.25  |
| Q838U8_1-400   | 400 | 0.39     | 4E-12   | 2wn4A | d.166.1.1                      | 3.90.176, 3.90.175, 3.90.210        | ADPRT toxin                              | 1    | 91.25  |
| Q838U8_351-487 | 137 | 0.000005 | 9E-27   | 2wn4A | d.166.1.1                      | 3.90.176, 3.90.175, 3.90.210        | ADPRT toxin                              | 1    | 89.75  |
| Q838U8_301-400 | 100 | 0.045    | 9E-22   | 2wn4A | d.166.1.1                      | 3.90.176, 3.90.175, 3.90.210        | ADPRT toxin                              | 1    | 68.5   |
| Q838U8_384-487 | 104 | 0.002    | 1E-26   | 1qs1A | d.166.1.1, d.166.1.1           | 3.90.176.10, 3.90.176.10            | ADPRT toxin                              | 1    | 68.33  |
| Q838U8_211-407 | 197 | 0.14     | 4E-14   | 2wn4A | d.166.1.1                      | 3.90.176, 3.90.175, 3.90.210        | ADPRT toxin                              | 1    | 66.5   |
| Q838U8_201-300 | 200 | 0.2      | 1E-13   | 2wn4A | d.166.1.1                      | 3.90.176, 3.90.175, 3.90.210        | ADPRT toxin                              | 1    | 63.5   |
| Q838U8_351-450 | 100 | 0.085    | 0.11    | 1ojqA | d.166.1.1                      | 3.90.176.10                         | ADPRT toxin                              | 1    | 61.5   |
| Q838U8_384-477 | 94  | 0.01     | 6E-10   | 1qs1A | d.166.1.1, d.166.1.1           | 3.90.176.10, 3.90.176.10            | ADPRT toxin                              | 1    | 58     |
| Q838U8_401-487 | 87  | 0.002    | 0.0003  | 2wn4A | d.166.1.1                      | 3.90.176, 3.90.175, 3.90.210        | ADPRT toxin                              | 1    | 55     |
| Q838U8_401-475 | 75  | 0.011    | 0.007   | 3buzA | d.166.1.1, d.166.1.1           | 3.90.176.10, 3.90.176.10            | ADPRT toxin                              | 1    | 50.75  |
| Q838U8_351-425 | 75  | 0.081    | 0.097   | 3bw8A | d.166.1.1                      | 3.90.176.10                         | ADPRT toxin                              | 1    | 48.75  |
| Q838U8_324-383 | 60  | 0.13     | 0.057   | 1g1qA | d.166.1.1, d.166.1.1           | 3.90.176.10, 3.90.176.10            | ADPRT toxin                              | 1    | 47.33  |
| Q838U8_418-487 | 70  | 0.002    | 0.001   | 2wn4A | d.166.1.1                      | 3.90.176, 3.90.175, 3.90.210        | ADPRT toxin                              | 1    | 43.5   |
| Q838U8_328-383 | 56  | 0.81     | 0.095   | 2wn4A | d.166.1.1                      | 3.90.176, 3.90.175, 3.90.210        | ADPRT toxin                              | 1    | 41.75  |
| Q838U8_301-375 | 75  | 0.12     | 0.079   | 2j3vA | d.166.1.1                      | 3.90.176, 3.90.175, 3.90.210        | ADPRT toxin                              | 1    | 40.75  |
| Q838U8_376-425 | 50  | 9        |         | 1gxyA | d.166.1.3                      | 3.90.176.10                         | ADPRT toxin                              | 1    | 37.5   |
| Q838U8_351-400 | 50  | 2.3      | 1.3     | 1g1qA | d.166.1.1, d.166.1.1           | 3.90.176.10, 3.90.176.10            | ADPRT toxin                              | 1    | 37.5   |
| Q838U8_326-375 | 50  | 2.6      | 0.98    | 1g1qA | d.166.1.1, d.166.1.1           | 3.90.176.10, 3.90.176.10            | ADPRT toxin                              | 1    | 36.75  |
| Q838U8_426-475 | 50  | 0.013    | 0.012   | 1qs1A | d.166.1.1, d.166.1.1           | 3.90.176.10, 3.90.176.10            | ADPRT toxin                              | 1    | 32.75  |
| Q838U8_401-450 | 50  | 0.43     | 0.33    | 3bw8A | d.166.1.1                      | 3.90.176.10                         | ADPRT toxin                              | 1    | 22.75  |
| Q838U8_251-350 | 100 | 1.5      | 0.12    | 2j3vA | d.166.1.1                      | 3.90.176, 3.90.175, 3.90.210        | ADPRT toxin                              | 1    | 11.5   |
| Q838U8_1-310   | 310 | 0.31     | 0.5     | 1mroB | a.89.1.1, d.58.31.2            | 3.30.70.470, 1.20.840.10            | methanogenesis                           | 2    | 67.25  |
| Q838U8_1-312   | 312 | 0.32     | 0.68    | 1mroB | a.89.1.1, d.58.31.2            | 3.30.70.470, 1.20.840.10            | methanogenesis                           | 2    | 57     |
| Q838U8_1-238   | 238 | 0.14     | 1.2     | 1u4qA | a.7.1.1, a.7.1.1, a.7.1.1      | 1.20.58.60, 1.20.58.60, 1.20.58.60  | spectrin                                 | 2    | 49.33  |
| Q838U8_1-300   | 300 | 0.3      | 0.28    | 1sumB | a.7.12.1                       | 1.20.58.220, 1.20.58.220            | transport protein                        | 2    | 36.75  |
| Q838U8_1-207   | 207 | 0.16     | 1.4     | 3hr0A | a.47.1                         | 1.20.58.240                         | transport protein                        | 2    | 33.25  |
| Q838U8_1-210   | 210 | 0.18     | 1.2     | 3hr0A | a.47.1                         | 1.20.58.240                         | transport protein                        | 2    | 32.5   |
| Q838U8_1-350   | 350 | 0.35     | 1.2     | 1fioA | a.47.2.1                       | 1.20.58.70                          | membrane protein                         | 2    | 32.5   |
| Q838U8_1-150   | 150 | 0.31     | 1.5     | 2wrgl | a.238.1                        | 1.20.1270                           | viral protein                            | 2    | 28.5   |
| Q838U8_1-250   | 250 | 0.19     | 0.25    | 1fioA | a.47.2.1                       | 1.20.58.70                          | membrane protein                         | 2    | 26.75  |
| Q838U8_1-100   | 100 | 4        | 1.2     | 2qupA | a.24.23                        | 1.20.120.490                        | structural genomics                      | 2    | 25     |
| Q838U8_101-200 | 100 | 1.1      | 0.26    | 1f68A | a.29.2.1                       | 1.20.920.10                         | transferase                              | 2    | 23.25  |
| Q838U8_1-75    | 75  | 2.5      | 0.6     | 2jq9A | a.7.14.1                       | 1.20.58                             | protein transport                        | 2    | 17.25  |
| Q838U8_101-175 | 75  | 2.7      | 1.6     | 3g0IA | a.29.2                         | 1.20.920                            | transcription                            | 2    | 13.25  |
| Q838U8_1-146   | 146 | 0.29     | 0.16    | 3fewX | f.1.1                          | 1.10.490                            | immune system                            |      | 41.5   |
| Q838U8_91-308  | 218 | 0.26     | 0.53    | 1chmA | c.55.2.1, d.127.1.1            | 3.40.350.10, 3.90.230.10            | creatinase                               |      | 33.25  |
| Q838U8_1-200   | 200 | 0.17     | 0.85    | 1colA | f.1.1.1                        | 1.10.490.30                         | antibacterial protein                    |      | 28.5   |
| Q838U8_1-144   | 144 | 0.33     | 0.13    | 3fewX | f.1.1                          | 1.10.490                            | immune system                            |      | 27     |
| Q838U8_201-300 | 100 | 0.42     | 0.33    | 1q1rA | c.3.1.5, c.3.1.5, d.87.1.1     | 3.50.50.60, 3.50.50.60, 3.30.390.30 | oxidoreductase                           |      | 24     |
| Q838U8_145-261 | 117 | 0.072    | 0.1     | 1tpvA | c.1.1.1                        | 3.20.20.70                          | isomerase(intramolecular oxidoreductase) |      | 23.75  |
| Q838U8_192-300 | 109 | 0.34     | 0.069   | 3fg2P | c.3.1, d.87.1, c.4.1           | 3.50.50                             | oxidoreductase                           |      | 23.75  |
| Q838U8_1-137   | 137 | 0.21     | 0.39    | 1qvrA | a.174.1.1, c.37.1.20, c.37.1.2 | 3.40.50.300, 3.40.50.300, 1.10.8.60 | chaperone                                |      | 23.5   |
| Q838U8_132-300 | 169 | 0.16     | 0.037   | 1sqbB | d.185.1.1, d.185.1.1           | 3.30.830.10, 3.30.830.10            | oxidoreductase                           |      | 22.75  |
| Q838U8_147-268 | 122 | 0.099    | 0.091   | 1lyxA | c.1.1.1                        | 3.20.20.70                          | isomerase                                |      | 22     |
| Q838U8_101-250 | 150 | 0.12     | 0.32    | 2hl7A | ?                              | ?                                   | oxidoreductase                           |      | 21.75  |
| Q838U8_138-300 | 163 | 0.16     | 0.82    | 3cwbB | d.185.1, d.185.1               | 3.30.830.10, 3.30.830.10            | oxidoreductase                           |      | 21.5   |
| Q838U8_251-300 | 50  | 9.6      | 0.28    | 3fybA | ?                              | ?                                   | structural genomics                      |      | 21     |



|                |     |       |       |       |                    |                                       |                               |  |       |
|----------------|-----|-------|-------|-------|--------------------|---------------------------------------|-------------------------------|--|-------|
| Q838U8_151-200 | 50  | 3.4   | 2.2   | 2e7uA | c.67.1             | 3.40.640                              | isomerase                     |  | 20.5  |
| Q838U8_51-125  | 75  | 0.13  | 3.3   | 2wltA | c.88.1             | ?                                     | hydrolase                     |  | 17.5  |
| Q838U8_201-275 | 75  | 0.87  | 4.5   | 1bcj1 | d.169.1.1, h.1.1.1 | 3.10.100.10                           | lectin                        |  | 14.5  |
| Q838U8_151-350 | 200 | 0.24  | 0.11  | 1p4wA | a.4.6.2            | 1.10.10.10                            | dna binding protein           |  | 13.75 |
| Q838U8_151-225 | 75  | 0.054 | 0.075 | 2rnjA | a.4.6              | 1.10.10.10                            | transcription                 |  | 13.75 |
| Q838U8_151-250 | 100 | 0.07  | 0.18  | 2q0oA | d.110.5, a.4.6     | 3.30.450                              | transcription                 |  | 13.75 |
| Q838U8_208-300 | 117 | 0.47  | 0.33  | 1litA | d.169.1.1          | 3.10.100.10                           | sugar binding                 |  | 13.25 |
| Q838U8_26-90   | 65  | 5.1   | 0.72  | 2kcdA | ?                  | ?                                     | structural genomics           |  | 12.75 |
| Q838U8_26-75   | 50  | 10    |       | 1txdA | a.87.1.1, b.55.1.1 | 2.30.29.30                            | signaling protein             |  | 12.25 |
| Q838U8_176-225 | 50  | 1.7   | 1.3   | 2ox9A | d.169.1            | 3.10.100.10                           | sugar binding                 |  | 12.25 |
| Q838U8_269-327 | 59  | 4     | 0.99  | 1f9dA | a.102.1.2          | 1.50.10.10, 2.170.160.10, 4.10.870.10 | hydrolase                     |  | 12    |
| Q838U8_201-350 | 150 | 0.91  | 0.46  | 2kftA | g.50.1             | 3.30.40                               | transcription/protein binding |  | 11.5  |
| Q838U8_301-350 | 50  | 1.4   | 0.78  | 1b8xA | a.45.1.1, c.47.1.5 | 3.40.30.10, 1.20.1050.10, 4.10.770.10 | signal protein                |  | 11.25 |
| Q838U8_76-125  | 50  | 4.7   | 3.1   | 2hpoA | d.92.1, b.98.1     | 3.40, 3.90.1240                       | hydrolase                     |  | 11    |
| Q838U8_126-175 | 50  | 3.6   | 1.5   | 2dvwB | c.37.1             | 3.40.50, 3.40.850, 3.40.1140, 1.10.8  | cell cycle/protein-binding    |  | 10.75 |
| Q838U8_51-100  | 50  | 2.7   | 1.2   | 1toaA | c.92.2.2           | 3.40.50.1980, 3.40.50.1980            | binding protein               |  | 10.25 |
| Q838U8_101-150 | 50  | 5.2   | 3.7   | 1cm5A | c.7.1.1            | 3.20.70.20                            | transferase                   |  | 10    |

## TccC5

| target name    | len | blast | pdb-psi | pdb   | scop                 | cath                         | interpret                        | rank | 3djury |
|----------------|-----|-------|---------|-------|----------------------|------------------------------|----------------------------------|------|--------|
| Q7N7Y7_1-700   | 700 | 1.8   | 1.1     | 1fwxA | b.6.1.4, b.69.3.1    | 2.130.10.10, 2.60.40.420     | oxidoreductase                   | 1    | 123    |
| Q7N7Y7_1-800   | 800 | 2.3   | 1.4     | 2iwfA | b.69.3, b.6.1        | 2.130.10.10, 2.60.40.420     | oxidoreductase                   | 1    | 113.25 |
| Q7N7Y7_1-550   | 550 | 1.5   | 2.3     | 1fwxA | b.6.1.4, b.69.3.1    | 2.130.10.10, 2.60.40.420     | oxidoreductase                   | 1    | 101    |
| Q7N7Y7_1-500   | 500 | 1.2   | 0.68    | 2iwfA | b.69.3, b.6.1        | 2.130.10.10, 2.60.40.420     | oxidoreductase                   | 1    | 99.25  |
| Q7N7Y7_1-400   | 400 | 1     | 0.26    | 1gotB | b.69.4.1             | 2.130.10.10                  | complex (gtp-binding/transducer) | 1    | 94.75  |
| Q7N7Y7_1-583   | 583 | 1.3   | 2.1     | 2iwfA | b.69.3, b.6.1        | 2.130.10.10, 2.60.40.420     | oxidoreductase                   | 1    | 92.25  |
| Q7N7Y7_1-900   | 900 | 0.44  | 0.82    | 1fwxA | b.6.1.4, b.69.3.1    | 2.130.10.10, 2.60.40.420     | oxidoreductase                   | 1    | 88     |
| Q7N7Y7_1-450   | 450 | 1.3   | 1.3     | 2iwfA | b.69.3, b.6.1        | 2.130.10.10, 2.60.40.420     | oxidoreductase                   | 1    | 85.75  |
| Q7N7Y7_1-350   | 350 | 0.87  | 0.71    | 2iwfA | b.69.3, b.6.1        | 2.130.10.10, 2.60.40.420     | oxidoreductase                   | 1    | 81.5   |
| Q7N7Y7_1-600   | 600 | 1.4   | 0.6     | 1fwxA | b.6.1.4, b.69.3.1    | 2.130.10.10, 2.60.40.420     | oxidoreductase                   | 1    | 77     |
| Q7N7Y7_201-450 | 250 | 0.96  | 2.3     | 2z2pA | b.68.9               | 2.120.10                     | lyase                            | 2    | 94.25  |
| Q7N7Y7_251-550 | 300 | 0.73  | 0.19    | 2fp8A | b.68.6               | 2.120.10                     | lyase                            | 2    | 78.5   |
| Q7N7Y7_201-350 | 150 | 0.45  | 0.33    | 3e5zA | b.68.6               | 2.120.10                     | lyase                            | 2    | 56     |
| Q7N7Y7_401-800 | 400 | 1.2   | 0.69    | 2z2pA | b.68.9               | 2.120.10                     | lyase                            | 2    | 51     |
| Q7N7Y7_401-850 | 450 | 0.22  | 0.23    | 2z2pA | b.68.9               | 2.120.10                     | lyase                            | 2    | 50.75  |
| Q7N7Y7_701-938 | 238 | 0.089 | 0.13    | 1r45A | d.166.1.1            | 3.90.176.10                  | ADPRT toxin                      | 3    | 92     |
| Q7N7Y7_730-938 | 209 | 0.09  | 0.004   | 1r45A | d.166.1.1            | 3.90.176.10                  | ADPRT toxin                      | 3    | 82.5   |
| Q7N7Y7_651-938 | 288 | 0.11  | 0.036   | 1r45A | d.166.1.1            | 3.90.176.10                  | ADPRT toxin                      | 3    | 80.25  |
| Q7N7Y7_701-850 | 150 | 0.046 | 0.088   | 1giqA | d.166.1.1, d.166.1.1 | 3.90.176.10, 3.90.176.10     | ADPRT toxin                      | 3    | 79.75  |
| Q7N7Y7_751-938 | 188 | 0.19  | 0.007   | 2a78B | d.166.1.1            | 3.90.176.10                  | ADPRT toxin                      | 3    | 52.5   |
| Q7N7Y7_773-886 | 144 | 1     | 0.012   | 1qs1A | d.166.1.1, d.166.1.1 | 3.90.176.10, 3.90.176.10     | ADPRT toxin                      | 3    | 49     |
| Q7N7Y7_584-938 | 355 | 0.098 | 0.45    | 1ojqA | d.166.1.1            | 3.90.176.10                  | ADPRT toxin                      | 3    | 48.67  |
| Q7N7Y7_701-800 | 100 | 0.61  | 0.16    | 2wn4A | d.166.1.1            | 3.90.176, 3.90.175, 3.90.210 | ADPRT toxin                      | 3    | 46.25  |
| Q7N7Y7_701-775 | 75  | 0.66  | 0.59    | 2wn4A | d.166.1.1            | 3.90.176, 3.90.175, 3.90.210 | ADPRT toxin                      | 3    | 42.5   |
| Q7N7Y7_751-850 | 100 | 0.075 | 0.16    | 2a78B | d.166.1.1            | 3.90.176.10                  | ADPRT toxin                      | 3    | 40.25  |
| Q7N7Y7_756-864 | 109 | 0.13  | 0.3     | 2gw1A | d.166.1.1            | 3.90.176, 3.90.175, 3.90.210 | ADPRT toxin                      | 3    | 37.25  |
| Q7N7Y7_801-938 | 138 | 0.77  | 0.11    | 2gw1A | d.166.1.1            | 3.90.176, 3.90.175, 3.90.210 | ADPRT toxin                      | 3    | 35.5   |
| Q7N7Y7_726-775 | 50  | 2.1   | 0.67    | 2wn4A | d.166.1.1            | 3.90.176, 3.90.175, 3.90.210 | ADPRT toxin                      | 3    | 34.75  |
| Q7N7Y7_801-900 | 100 | 0.45  | 0.55    | 2wn4A | d.166.1.1            | 3.90.176, 3.90.175, 3.90.210 | ADPRT toxin                      | 3    | 27.75  |
| Q7N7Y7_751-825 | 75  | 0.095 | 0.12    | 1r45A | d.166.1.1            | 3.90.176.10                  | ADPRT toxin                      | 3    | 27.75  |
| Q7N7Y7_601-938 | 338 | 0.15  | 0.73    | 2wn4A | d.166.1.1            | 3.90.176, 3.90.175, 3.90.210 | ADPRT toxin                      | 3    | 16     |
| Q7N7Y7_801-850 | 50  | 10    | 6.2     | 2wn4A | d.166.1.1            | 3.90.176, 3.90.175, 3.90.210 | ADPRT toxin                      | 3    | 11     |
| Q7N7Y7_865-918 | 54  | 0.98  | 0.094   | 3bw8A | d.166.1              | 3.90.176.10                  | ADPRT toxin                      | 3    | 10.5   |
| Q7N7Y7_1-750   | 750 | 2.1   | 1.2     | 2fkjA | b.76.1               | 3.90.930                     | OspA                             | 4    | 83     |
| Q7N7Y7_1-341   | 341 | 0.85  | 1.6     | 2fkjA | b.76.1               | 3.90.930                     | OspA                             | 4    | 80.25  |
| Q7N7Y7_301-650 | 350 | 6.5   | 0.79    | 1fj1E | b.76.1               | 3.90.930                     | OspA                             | 4    | 77     |
| Q7N7Y7_342-729 | 388 | 1.1   | 8.4     | 2hkdA | b.76.1               | 3.90.930                     | OspA                             | 4    | 74.5   |
| Q7N7Y7_1-850   | 850 | 0.41  | 2.2     | 2fkjA | b.76.1               | 3.90.930                     | OspA                             | 4    | 73.25  |
| Q7N7Y7_1-300   | 300 | 3.3   | 0.22    | 1fj1E | b.76.1               | 3.90.930                     | OspA                             | 4    | 71     |
| Q7N7Y7_101-250 | 150 | 4.8   | 0.83    | 2i5vO | b.76.1               | 3.90.930                     | OspA                             | 4    | 70.25  |
| Q7N7Y7_401-600 | 200 | 1.5   |         | 2oy7A | b.76.1               | 3.90.930                     | OspA                             | 4    | 70     |
| Q7N7Y7_151-350 | 200 | 0.51  | 2.3     | 2fkjA | b.76.1               | 3.90.930                     | OspA                             | 4    | 69.25  |
| Q7N7Y7_1-250   | 250 | 2.5   | 1.7     | 2oy7A | b.76.1               | 3.90.930                     | OspA                             | 4    | 68.75  |
| Q7N7Y7_301-500 | 200 | 1.8   | 0.031   | 2i5vO | b.76.1               | 3.90.930                     | OspA                             | 4    | 63.5   |
| Q7N7Y7_1-650   | 650 | 1.7   | 0.74    | 2hkdA | b.76.1               | 3.90.930                     | OspA                             | 4    | 63     |
| Q7N7Y7_351-750 | 400 | 1.1   | 8.8     | 2hkdA | b.76.1               | 3.90.930                     | OspA                             | 4    | 63     |
| Q7N7Y7_151-250 | 100 | 3.8   | 0.62    | 1fj1E | b.76.1               | 3.90.930                     | OspA                             | 4    | 62.75  |
| Q7N7Y7_451-650 | 200 | 0.88  | 1.8     | 2ol6O | b.76.1               | 3.90.930                     | OspA                             | 4    | 60.5   |
| Q7N7Y7_401-650 | 250 | 1.6   | 0.63    | 1fj1E | b.76.1               | 3.90.930                     | OspA                             | 4    | 60.25  |

|                |     |      |       |       |                      |                                 |                    |   |       |
|----------------|-----|------|-------|-------|----------------------|---------------------------------|--------------------|---|-------|
| Q7N7Y7_1-200   | 200 | 2.3  | 0.16  | 1fj1E | b.76.1               | 3.90.930                        | OspA               | 4 | 58.5  |
| Q7N7Y7_201-400 | 200 | 0.7  | 1.2   | 2oy5O | b.76.1               | 3.90.930                        | OspA               | 4 | 56.5  |
| Q7N7Y7_201-300 | 100 | 5.2  | 1.6   | 2oy8A | b.76.1               | 3.90.930                        | OspA               | 4 | 53.67 |
| Q7N7Y7_401-550 | 150 | 5.6  | 0.17  | 2oy8A | b.76.1               | 3.90.930                        | OspA               | 4 | 51.5  |
| Q7N7Y7_501-800 | 300 | 0.82 | 1.2   | 2i5vO | b.76.1               | 3.90.930                        | OspA               | 4 | 46.75 |
| Q7N7Y7_101-200 | 100 | 2.4  | 0.81  | 2fkgA | b.76.1               | 3.90.930                        | OspA               | 4 | 43    |
| Q7N7Y7_176-266 | 91  | 3.6  | 0.93  | 2fkjA | b.76.1               | 3.90.930                        | OspA               | 4 | 41.5  |
| Q7N7Y7_1-100   | 100 | 1.2  | 0.32  | 2i5vO | b.76.1               | 3.90.930                        | OspA               | 4 | 41    |
| Q7N7Y7_501-938 | 438 | 0.18 | 0.29  | 2hkdA | b.76.1               | 3.90.930                        | OspA               | 4 | 39    |
| Q7N7Y7_251-350 | 100 | 0.49 | 0.053 | 2fkjA | b.76.1               | 3.90.930                        | OspA               | 4 | 38.75 |
| Q7N7Y7_78-175  | 98  | 0.97 | 0.94  | 2hkdA | b.76.1               | 3.90.930                        | OspA               | 4 | 37.75 |
| Q7N7Y7_301-450 | 150 | 2.7  | 4.5   | 2oy8A | b.76.1               | 3.90.930                        | OspA               | 4 | 36.5  |
| Q7N7Y7_401-500 | 100 | 2.9  | 0.9   | 2hkdA | b.76.1               | 3.90.930                        | OspA               | 4 | 36    |
| Q7N7Y7_501-650 | 150 | 0.48 | 0.66  | 2ol6O | b.76.1               | 3.90.930                        | OspA               | 4 | 35.5  |
| Q7N7Y7_551-938 | 388 | 0.18 | 0.97  | 1fj1E | b.76.1               | 3.90.930                        | OspA               | 4 | 35    |
| Q7N7Y7_1-150   | 150 | 1.8  | 0.014 | 2oy5O | b.76.1               | 3.90.930                        | OspA               | 4 | 33.25 |
| Q7N7Y7_51-150  | 100 | 1.2  | 0.74  | 2fkjA | b.76.1               | 3.90.930                        | OspA               | 4 | 32.5  |
| Q7N7Y7_451-550 | 100 | 4.1  | 0.45  | 2oy7A | b.76.1               | 3.90.930                        | OspA               | 4 | 32.25 |
| Q7N7Y7_551-650 | 100 | 2.7  | 0.29  | 1fj1E | b.76.1               | 3.90.930                        | OspA               | 4 | 31.25 |
| Q7N7Y7_101-175 | 75  | 0.95 | 0.24  | 2oy7A | b.76.1               | 3.90.930                        | OspA               | 4 | 30.5  |
| Q7N7Y7_201-275 | 75  | 8.8  | 4.5   | 1fj1E | b.76.1               | 3.90.930                        | OspA               | 4 | 30.5  |
| Q7N7Y7_51-125  | 75  | 7.2  | 3     | 2i5vO | b.76.1               | 3.90.930                        | OspA               | 4 | 29.5  |
| Q7N7Y7_451-525 | 75  | 3.9  | 0.34  | 2i5vO | b.76.1               | 3.90.930                        | OspA               | 4 | 29    |
| Q7N7Y7_251-325 | 75  | 0.69 | 0.38  | 2i5vO | b.76.1               | 3.90.930                        | OspA               | 4 | 28.75 |
| Q7N7Y7_305-434 | 130 | 1.4  | 0.8   | 2oy5O | b.76.1               | 3.90.930                        | OspA               | 4 | 28.5  |
| Q7N7Y7_351-425 | 75  | 8.4  | 3.2   | 2oy8A | b.76.1               | 3.90.930                        | OspA               | 4 | 28.5  |
| Q7N7Y7_401-475 | 75  | 5.6  | 0.41  | 2fkjA | b.76.1               | 3.90.930                        | OspA               | 4 | 26.75 |
| Q7N7Y7_351-450 | 100 | 10   | 0.4   | 2oy8A | b.76.1               | 3.90.930                        | OspA               | 4 | 22.75 |
| Q7N7Y7_76-125  | 50  | 5.6  | 4.2   | 1fj1E | b.76.1               | 3.90.930                        | OspA               | 4 | 22.5  |
| Q7N7Y7_101-150 | 50  | 2.7  | 3.9   | 2fkgA | b.76.1               | 3.90.930                        | OspA               | 4 | 21    |
| Q7N7Y7_151-225 | 75  | 4.9  | 0.26  | 2oy5O | b.76.1               | 3.90.930                        | OspA               | 4 | 18.75 |
| Q7N7Y7_301-400 | 100 | 1.4  | 0.75  | 1fj1E | b.76.1               | 3.90.930                        | OspA               | 4 | 16.25 |
| Q7N7Y7_551-625 | 75  | 1.2  | 0.88  | 2i5vO | b.76.1               | 3.90.930                        | OspA               | 4 | 15.5  |
| Q7N7Y7_251-300 | 50  | 6.3  | 0.44  | 2hkdA | b.76.1               | 3.90.930                        | OspA               | 4 | 12    |
| Q7N7Y7_126-175 | 50  | 10   | 0.25  | 2i5vO | b.76.1               | 3.90.930                        | OspA               | 4 | 11.5  |
| Q7N7Y7_326-375 | 50  | 1.2  | 1.6   | 2oy8A | b.76.1               | 3.90.930                        | OspA               | 4 | 11.5  |
| Q7N7Y7_1-77    | 77  | 1.9  | 0.56  | 2i5vO | b.76.1               | 3.90.930                        | OspA               | 4 | 11    |
| Q7N7Y7_201-250 | 50  | 8.6  | 5.7   | 2oy8A | b.76.1               | 3.90.930                        | OspA               | 4 | 11    |
| Q7N7Y7_226-275 | 50  | 10   | 3.2   | 2i5vO | b.76.1               | 3.90.930                        | OspA               | 4 | 11    |
| Q7N7Y7_151-200 | 50  | 9.9  | 1.8   | 2i5vO | b.76.1               | 3.90.930                        | OspA               | 4 | 10.5  |
| Q7N7Y7         | 938 | 0.29 | 3     | 1nr0A | b.69.4.1, b.69.4.1   | 2.130.10.10, 2.130.10.10        | structural protein | 5 | 70.75 |
| Q7N7Y7_435-572 | 138 | 0.97 | 0.56  | 2c26A | b.1.3 / b.18.1       | 2.60.40, 2.60.120               | hydrolase          | 6 | 52.25 |
| Q7N7Y7_501-575 | 75  | 1.4  | 1.9   | 2boiA | b.115.1              | 2.60.120.400                    | lectin             | 6 | 29    |
| Q7N7Y7_601-675 | 75  | 0.19 | 0.3   | 2ac1A | b.67.2, b.29.1       | 2.115.10; 2.60.120, 2.70.10     | hydrolase          | 6 | 24.25 |
| Q7N7Y7_601-700 | 100 | 0.19 | 0.29  | 1y4wA | b.29.1.19, b.67.2.3  | 2.60.120.560                    | hydrolase          | 6 | 22.25 |
| Q7N7Y7_601-750 | 150 | 0.33 | 0.28  | 2ac1A | b.67.2 / b.29.1      | 2.115.10; 2.60.120, 2.70.10     | hydrolase          | 6 | 14.75 |
| Q7N7Y7_601-850 | 250 | 0.11 | 0.3   | 1st8A | b.67.2 / b.29.1      | 2.115.10; 2.60.120, 2.70.10     | hydrolase          | 6 | 14.75 |
| Q7N7Y7_601-800 | 200 | 0.54 | 0.64  | 1st8A | b.67.2 / b.29.1      | 2.115.10; 2.60.120, 2.70.10     | hydrolase          | 6 | 14.75 |
| Q7N7Y7_601-650 | 50  | 4.5  | 0.62  | 1st8A | b.67.2 / b.29.1      | 2.115.10; 2.60.120, 2.70.10     | hydrolase          | 6 | 10    |
| Q7N7Y7_451-938 | 488 | 0.22 | 1.1   | 2pu3A | d.4.1                | 3.90.540, 3.90.75, 3.40.570     | hydrolase          |   | 40    |
| Q7N7Y7_501-600 | 100 | 0.95 | 2.6   | 1p30A | b.121.2.2, b.121.2.2 | 2.170.9.10, 3.90.39.10, 3.90.24 | viral protein      |   | 34.25 |

|                |     |      |      |       |           |                                 |                               |  |       |
|----------------|-----|------|------|-------|-----------|---------------------------------|-------------------------------|--|-------|
| Q7N7Y7_351-400 | 50  | 10   | 1.5  | 1ewkA | c.93.1.1  | 3.40.50.2300, 3.40.50.2300      | signaling protein             |  | 24    |
| Q7N7Y7_626-675 | 50  | 0.24 | 0.51 | 2nujA | d.38.1.1  | 3.10.129.10                     | hydrolase                     |  | 23.25 |
| Q7N7Y7_627-675 | 49  | 0.34 | 0.54 | 2nujA | d.38.1.1  | 3.10.129.10                     | hydrolase                     |  | 23.25 |
| Q7N7Y7_851-938 | 88  | 0.8  | 0.12 | 1ftkA | c.94.1.1  | 3.40.190.10, 3.40.190.10        | membrane protein              |  | 19.75 |
| Q7N7Y7_801-875 | 75  | 8.3  |      | 2hknA | b.34.10   | 2.30.30                         | structural protein            |  | 16.5  |
| Q7N7Y7_651-725 | 75  | 1.3  | 0.67 | 1vh0A | c.116.1.3 | 3.40.1280.10                    | structural genomics           |  | 16    |
| Q7N7Y7_1-75    | 75  | 2    | 0.54 | 1qgwA | d.184.1.1 | 3.90.510.10                     | photosynthesis                |  | 15.75 |
| Q7N7Y7_851-925 | 75  | 1    | 0.14 | 1zcfA | c.88.1    | 3.40.50.1170, 3.40.50.40        | hydrolase                     |  | 15.25 |
| Q7N7Y7_573-626 | 54  | 5.1  | 3.2  | 2w4eA | d.113.1   | 3.90.79                         | hydrolase                     |  | 12.75 |
| Q7N7Y7_677-737 | 61  | 10   | 2.9  | 1sgcA | b.47.1.1  | 2.40.10.10, 2.40.10.10          | hydrolase (serine proteinase) |  | 12.5  |
| Q7N7Y7_301-375 | 75  | 1.5  | 1.5  | 1pseA | b.34.4.2  | 2.30.30.50                      | photosystem                   |  | 11.75 |
| Q7N7Y7_276-325 | 50  | 1.1  | 0.51 | 2iovA | d.22.1    | 2.40.155                        | luminescent protein           |  | 11.75 |
| Q7N7Y7_451-500 | 50  | 4    | 0.72 | 2zpcA | b.125.1   | 2.50.20.10                      | protein transport             |  | 11.75 |
| Q7N7Y7_576-625 | 50  | 5.3  | 7.7  | 2yvmA | d.113.1   | 3.90.79                         | hydrolase                     |  | 11.75 |
| Q7N7Y7_426-475 | 50  | 8    | 5.8  | 3exwA | b.21.1    | 2.60.90.10                      | viral protein                 |  | 11.5  |
| Q7N7Y7_51-100  | 50  | 9.4  | 2.3  | 1l0oA | d.122.1.3 | 3.30.565.10                     | protein binding               |  | 11.5  |
| Q7N7Y7_401-450 | 50  | 6.3  | 1.7  | 3f9wA | b.85.7    | 3.90.1410, 2.170.270            | transferase                   |  | 11.5  |
| Q7N7Y7_676-755 | 80  | 3.3  | 0.96 | 1pfoA | f.9.1.1   | 3.90.840.10, 3.30.1040.20, 2.60 | toxin                         |  | 11.5  |
| Q7N7Y7_751-800 | 50  | 3.5  | 8.2  | 1wiaA | d.15.1.1  | 3.10.20                         | structural genomics           |  | 11.25 |
| Q7N7Y7_826-875 | 50  | 10   |      | 1si8A | e.5.1.1   | ?                               | oxidoreductase                |  | 11    |
| Q7N7Y7_551-600 | 50  | 1.4  | 3.5  | 1g2pA | c.61.1.1  | 3.40.50.2020                    | transferase                   |  | 11    |
| Q7N7Y7_676-725 | 50  | 10   | 2.9  | 1vh0A | c.116.1.3 | 3.40.1280.10                    | structural genomics           |  | 10.75 |
| Q7N7Y7_501-550 | 50  | 10   | 4.8  | 2oqqA | c.23.1    | 3.40.50                         | transcription                 |  | 10.5  |
| Q7N7Y7_651-750 | 100 | 1.8  | 0.93 | 1iruC | d.153.1.4 | 3.60.20.10                      | hydrolase                     |  | 10.5  |
| Q7N7Y7_476-525 | 50  | 10   | 0.67 | 2b3tB | e.38.1.1  | ?                               | translation                   |  | 10.25 |
| Q7N7Y7_301-350 | 50  | 4.3  | 2.6  | 3bbnP | d.27.1    | 3.30.1320                       | ribosome                      |  | 10    |
| Q7N7Y7_651-700 | 50  | 3.2  | 1.2  | 2gccA | d.10.1.2  | 3.30.730.10                     | transcription factor          |  | 10    |

**Vis toxin**

| target name    | len | blast | pdb-psi | pdb   | scop                 | cath                         | interpret     | Rank | 3djury |
|----------------|-----|-------|---------|-------|----------------------|------------------------------|---------------|------|--------|
| A3UNN4         | 249 | 0.002 | 2E-30   | 1giqA | d.166.1.1, d.166.1.1 | 3.90.176.10, 3.90.176.10     | ADPRT toxin   | 1    | 135    |
| A3UNN4_1-200   | 200 | 0.008 | 4E-29   | 1giqA | d.166.1.1, d.166.1.1 | 3.90.176.10, 3.90.176.10     | ADPRT toxin   | 1    | 126.5  |
| A3UNN4_1-150   | 150 | 0.11  | 3E-21   | 2wn4A | d.166.1.1            | 3.90.176, 3.90.175, 3.90.210 | ADPRT toxin   | 1    | 92.5   |
| A3UNN4_101-249 | 149 | 0.036 | 2E-17   | 2a78B | d.166.1.1            | 3.90.176.10                  | ADPRT toxin   | 1    | 72.75  |
| A3UNN4_51-150  | 100 | 0.15  | 2E-16   | 2bovB | d.166.1.1            | 3.90.176.10                  | ADPRT toxin   | 1    | 70.25  |
| A3UNN4_101-200 | 100 | 0.28  | 6E-11   | 2wn4A | d.166.1.1            | 3.90.176, 3.90.175, 3.90.210 | ADPRT toxin   | 1    | 60.75  |
| A3UNN4_51-125  | 75  | 0.74  | 0.0002  | 2wn4A | d.166.1.1            | 3.90.176, 3.90.175, 3.90.210 | ADPRT toxin   | 1    | 50.75  |
| A3UNN4_1-100   | 100 | 1.3   | 0.024   | 3buzA | d.166.1.1, d.166.1.1 | 3.90.176.10, 3.90.176.10     | ADPRT toxin   | 1    | 49.5   |
| A3UNN4_151-225 | 75  | 0.3   | 0.003   | 2a78B | d.166.1.1            | 3.90.176.10                  | ADPRT toxin   | 1    | 44     |
| A3UNN4_101-175 | 75  | 0.3   | 0.04    | 1qs1A | d.166.1.1, d.166.1.1 | 3.90.176.10, 3.90.176.10     | ADPRT toxin   | 1    | 42.5   |
| A3UNN4_151-249 | 99  | 0.21  | 0.002   | 2bovB | d.166.1.1            | 3.90.176.10                  | ADPRT toxin   | 1    | 41     |
| A3UNN4_1-75    | 75  | 10    | 0.34    | 2j3vA | d.166.1.1            | 3.90.176, 3.90.175, 3.90.210 | ADPRT toxin   | 1    | 21.25  |
| A3UNN4_201-249 | 49  | 3.6   | 0.18    | 2volA | b.1.1, b.1.1         | 2.60.40.10, 2.60.40.10       | immune system | 2    | 11.75  |
